# 1 Improved heritability partitioning and enrichment 2 analyses using summary statistics with graphREML

3 Hui Li<sup>1</sup>, Tushar Kamath<sup>2,3</sup>, Rahul Mazumder<sup>4</sup>, Xihong Lin<sup>1,5\*</sup>, and Luke O'Connor<sup>3,6\*</sup>

4 <sup>1</sup>Harvard T.H. Chan School of Public Health, Department of Biostatistics, Boston, USA

5 <sup>2</sup>Massachusetts General Hospital, Department of Medicine, Boston, USA

6 <sup>3</sup>Harvard Medical School, Department of Biomedical Informatics, Boston, USA

7 <sup>4</sup>Massachusetts Institute of Technology, Operations Research and Statistics group, Cambridge, USA

8 <sup>5</sup>Harvard University, Department of Statistics, Cambridge, USA

9 <sup>6</sup>Broad Institute, Program in Medical and Population Genetics, Cambridge, USA

10 \*Equal contributions. Corresponding author: [loconnor@broadinstitute.org](mailto:loconnor@broadinstitute.org), [hui\\_li@g.harvard.edu](mailto:hui_li@g.harvard.edu)

## 11 ABSTRACT

Heritability enrichment analysis using data from Genome-Wide Association Studies (GWAS) is often used to understand the functional basis of genetic architecture. Stratified LD score regression (S-LDSC) is a widely used method-of-moments estimator for heritability enrichment, but S-LDSC has low statistical power compared with likelihood-based approaches. We introduce graphREML, a precise and powerful likelihood-based heritability partition and enrichment analysis method. graphREML operates on  
12 GWAS summary statistics and linkage disequilibrium graphical models (LDGMs), whose sparsity makes likelihood calculations tractable. We validate our method using extensive simulations and in analyses of a wide range of real traits. On average across traits, graphREML produces enrichment estimates that are concordant with S-LDSC, indicating that both methods are unbiased; however, graphREML identifies 2.5 times more significant trait-annotation enrichments, demonstrating greater power compared to the moment-based S-LDSC approach. graphREML can also more flexibly model the relationship between the annotations of a SNP and its heritability, producing well-calibrated estimates of per-SNP heritability.

## 13 Introduction

14 Heritability partitioning is a powerful approach to integrate genetic association data with variance func-  
15 tional genomic data<sup>1</sup>, by quantifying the heritability enrichment of a derived annotation. This approach  
16 has been used to identify disease-relevant regulatory annotations<sup>2-4</sup>, to prioritize disease-relevant genes  
17 and cell types<sup>5,6</sup>, to investigate the effect of negative selection on genetic architecture<sup>7-10</sup>, and to compare  
18 common vs. rare variant architecture<sup>8,11,12</sup>.

19 For common and low-frequency variants, the most widely used heritability enrichment method is  
20 stratified LD score regression (S-LDSC)<sup>3,7,13</sup>. This method is fast, and it operates on publicly available  
21 summary association statistics; S-LDSC can also jointly analyze a large number of overlapping annotations.  
22 These features distinguish S-LDSC from REML-based methods<sup>14-16</sup>, which require individual level GWAS  
23 data and cannot handle overlapping annotations. However, S-LDSC can have much lower statistical power  
24 compared with likelihood-based methods, such that many enrichments may go undetected.

25 This trade-off arises from the difficulty of fully modeling linkage disequilibrium (LD), and in particular,  
26 incorporating it into likelihood calculations. S-LDSC relies on "LD scores," which summarize the LD  
27 matrix but result in loss of information<sup>17</sup>. This has motivated various approaches to represent LD  
28 parsimoniously, such as shrinkage regularization<sup>18</sup>, banding<sup>19-21</sup>, truncated SVD<sup>22,23</sup> or a combination of  
29 the latter two<sup>17,24,25</sup>. Recently, Nowbandegani and Wohns et al. proposed LD graphical models (LDGMs),  
30 which represent LD patterns using extremely sparse matrices derived from genome-wide genealogies<sup>26</sup>.  
31 The edge between two adjacent SNPs in the LDGM corresponds to a genealogical relationship between  
32 the ancestral haplotypes on which they arise as mutations<sup>27</sup>. LDGMs enable the use of efficient sparse  
33 matrix operations to perform likelihood calculations with GWAS data, potentially addressing the challenge  
34 of likelihood-based heritability partitioning.

35 We propose graphREML, a likelihood-based heritability partitioning method that operates on GWAS  
36 summary statistics and LDGMs. graphREML improves upon S-LDSC by modeling the full likelihood  
37 of the summary statistics, making it more precise and powerful than S-LDSC. Moreover, by directly  
38 modeling the likelihood of variant-level summary statistics, graphREML is capable of handling overlapping

39 annotations, unlike the existing REML-based methods which require individual-level data. Because of  
40 its higher precision and statistical power, graphREML is particularly advantageous for estimating the  
41 heritability enrichment of disease traits which are under-powered using S-LDSC. graphREML is also  
42 robust to various forms of model misspecification, e.g., when there is sample mismatch between the  
43 GWAS statistics and the LDGM precision matrices.

44 We validated our method in simulations and in analyses of real traits, comparing the enrichment  
45 estimates from our method to those from the S-LDSC. We chose S-LDSC in particular because it is  
46 the most widely used method that also operates on summary statistics. One other method that uses  
47 summary statistics is SumHer<sup>28</sup>; SumHer fits a different heritability model from S-LDSC, but its inference  
48 approach is similar. We also estimated heritability at a per-SNP level, as opposed to at an aggregate level,  
49 highlighting the advantages of our approach. Lastly, we note that graphREML can be integrated with  
50 other analytical frameworks that utilize enrichment estimates, such as the Abstract Mediation Model  
51 (AMM)<sup>29</sup>; this led to a more precise quantification of the degree of mediated heritability by a gene set  
52 (e.g., constrained genes).

## 53 Results

### 54 Overview of graphREML

55 We propose using a maximum-likelihood approach to estimate partitioned heritability and enrichment.  
56 Under the standard assumptions of genetic association modeling, the distribution of the summary asso-  
57 ciation statistics can be derived<sup>17,30</sup>. Ideally, a maximum-likelihood estimator would be used; however,  
58 the likelihood is parameterized by the LD matrix, such that it can be expensive to compute. We exploit  
59 the sparsity of the LDGM precision matrices to enable tractable maximization of the GWAS likelihood  
60 (**Online Methods**). We employ a second-order optimization method with an approximate Hessian and  
61 a trust region algorithm to make the maximization algorithm stable<sup>16</sup> (**Online Methods**). With these  
62 optimizations, the estimation is tractable but still slow, typically requiring 1-3 days for convergence.

A peculiarity of S-LDSC is that for many individual SNPs, its linear heritability model would suggest

that their heritability is negative. Because S-LDSC cannot accommodate a non-linear relationship between the heritability of a SNP and its annotations, it cannot enforce non-negativity. In contrast, graphREML uses a non-negative inverse link function to map between the linear combination of the annotations of a SNP and its expected heritability. Let  $\mathbf{a}_j$  denote the annotation values of SNP  $j$ . We model the per-SNP heritability of SNP  $j$  as:

$$\sigma_j^2 = g^{-1}(\eta_j), \text{ where } \eta_j = \mathbf{a}_j^\top \boldsymbol{\tau},$$

63 where  $\boldsymbol{\tau}$  is a vector of unknown parameters that encodes the genetic architecture of a trait, and  $g(\cdot)$  is a  
64 non-negative link function<sup>31</sup>. S-LDSC assumes an identity link,  $g(x) = x$ . graphREML is guaranteed to  
65 produce valid non-negative per-SNP heritability estimates, as long as an appropriate link  $g(\cdot)$  is applied.

66 An important feature of S-LDSC is that it can distinguish polygenic effects from confounding due  
67 to population stratification and relatedness<sup>13</sup>. graphREML does not model uncorrected population  
68 stratification. Instead, it requires the appropriate correction for population stratification either directly at  
69 the individual-level (before association testing), or at the summary-statistics level by taking the S-LDSC  
70 intercept as an input in order to account for confounding (**Online Methods**).

71 The marginal heritability enrichment of an annotation may differ from the conditional enrichment. The  
72 marginal enrichment can be driven by overlap with other annotations, whereas the conditional enrichment  
73 measures the additional enrichment in an annotation after accounting for its overlap with others<sup>3</sup>. A positive  
74 conditional enrichment implies that SNPs in that annotation have greater heritability than expected given  
75 their other annotations. graphREML (like S-LDSC) estimates both types of enrichment. In this manuscript,  
76 we report enrichments estimated under the baselineLD model, which is widely used in conjunction with  
77 S-LDSC<sup>7</sup>. This model has been shown to account for frequency-dependent and LD-dependent architecture,  
78 which otherwise cause bias when estimating either conditional or marginal heritability enrichments<sup>32</sup>.

79 We estimate the standard error of enrichment using an approximate jackknife estimator. More  
80 specifically, we compute the empirical variance of the leave-one-LD-block-out estimates of the parameters  
81 as the jackknife covariance estimator of the conditional enrichment coefficients  $\boldsymbol{\tau}$  (**Online Methods**). The  
82 jackknife procedure is computationally efficient, not requiring the model to be re-fitted. For significance

83 testing, we adopt a similar procedure as S-LDSC, applying a Wald test with jackknife standard errors  
84 to the difference, rather than the ratio, between the per-SNP heritability in versus out of an annotation.  
85 We apply the Delta method to obtain the asymptotic variance of these enrichment test statistics (**Online**  
86 **Methods**).

87 Some users may wish to test a large set of annotations – for example, derived from pathways or cell  
88 types – conditional on a shared baseline model. We developed a fast score test for conditional heritability  
89 enrichment, graphREML-ST, that only requires fitting the baseline model once. This test runs in a few  
90 seconds, and does not even require access to the original summary statistics or LDGMs (**Online Methods**).

### 91 **Performance of graphREML in simulations**

92 To evaluate the performance of graphREML and to compare it with that of S-LDSC, we simulated marginal  
93 association statistics using the LDGM precision matrices calculated from the European samples in the  
94 1000 Genome project (**Online Methods**). Directly simulating summary statistics provides us with the  
95 flexibility to vary the sample size of the underlying association study. We used the S-LDSC baseline LD  
96 heritability model, and included 13 real functional annotations from the baselineLD model of the imputed  
97 SNPs on chromosome 1 ( $p = 513,012$ ) and 4 simulated annotations comprising randomly selected SNPs  
98 (**Online Methods, Supplementary Table 1**). We applied graphREML and S-LDSC to the simulated  
99 summary statistics and evaluated the bias and the variance of each method. In particular, we report their  
100 statistical relative efficiency ("RE"), defined as the ratio between the sampling variances of S-LDSC  
101 and graphREML. A RE value greater than one indicates graphREML is more statistically efficient than  
102 S-LDSC and vice versa for values less than one.

103 We found that both graphREML and S-LDSC produced unbiased enrichment estimates, but graphREML  
104 was much more precise with a RE of 2.47 averaged across annotations (**Figure 1a, Supplementary Figure**  
105 **1**). For both methods, sampling variance is inversely correlated to sample size (**Supplementary Figure**  
106 **2**); however, graphREML is more precise at any sample size, and its improvement upon S-LDSC is  
107 roughly equivalent to a two-fold increase in sample size (**Supplementary Table 2**). We analyzed random  
108 annotations of different size and connectedness, comprising 1% or 10% of either SNPs or LD blocks. For

109 both methods, sampling variance was dependent on both factors (**Supplementary Figure 3**). The relative  
110 performance between graphREML and S-LDSC was similar when measured by mean square error, which  
111 accounts for both bias and variance (**Supplementary Table 2**).

112 Misspecification of the random-effect model is a potential source of bias in heritability estimation. To  
113 test the robustness of graphREML, we varied the genetic architecture of a simulated phenotype in three  
114 ways (**Online Methods**). First, we simulated effect sizes under a sparse, non-infinitesimal distribution,  
115 varying the proportion of causal SNPs. Second, we generated summary statistics using several different  
116 link functions, with its inverse mapping from the annotations of a SNP to its heritability. Third, we  
117 explicitly modeled the MAF-dependent genetic architectures and varied the strength of the dependency<sup>9</sup>.

118 Under a sparse genetic architecture, both graphREML and S-LDSC remained unbiased and had  
119 higher sampling variance than that under an infinitesimal architecture. Across all settings of different  
120 mixture components and parameters, graphREML has a higher statistical efficiency, with an average RE  
121 of 2.73 compared to S-LDSC (**Figure 1b**, **Supplementary Figure 4**, **Supplementary Table 3**). Similarly,  
122 both methods were robust to the choice of link function and remain unbiased, but graphREML is more  
123 statistically efficient than S-LDSC, with an average RE of 2.54 across link functions (**Supplementary**  
124 **Figure 5**, **Supplementary Table 5**). In simulations involving MAF-dependent architecture, again, both  
125 methods were robust when we included MAF bins as binary annotations (as implemented in the baselineLD  
126 model<sup>7</sup>) (**Figure 1b**). This approach, with binary MAF-bin annotations, yielded more robust heritability  
127 estimates than the approach of using a single continuous-valued MAF annotation, likely because the  
128 former is nonparametric and imposes less constraint on the form of the relationship between allele  
129 frequency and effect size (**Supplementary Figure 6**, **Online Methods**). We did not detect any correlation  
130 between sparsity or the degree of MAF-dependency and the relative efficiency comparing graphREML  
131 with S-LDSC (**Supplementary Figure 7**, **Supplementary Table 3-4**).

132 We evaluated the calibration of our estimated standard errors. Under the null, we found that the  
133 jackknife-based significance for the conditional enrichment has well-controlled type I error rates (**Figure**  
134 **1c**). We observed slightly inflated type I error rates for small null annotations, but only under the sparsest

135 simulated architecture (**Supplementary Figure 19**), consistent with previous studies<sup>33</sup>. In non-null  
136 simulations, graphREML was well-powered (**Supplementary Figure 18**). We compared our jackknife  
137 approach with the Huber-White sandwich estimator (**Online Methods**). The inference results for the  
138 conditional enrichment coefficients are similar between using the jackknife estimator and the sandwich  
139 estimator (**Supplementary Figure 20**), but the jackknife estimator leads to more well-calibrated SE for  
140 the marginal enrichments than the sandwich estimator under sparse architectures (**Supplemetnary Figure**  
141 **8**). Therefore, graphREML produces both estimators of SE but uses jackknife for testing by default.

142 A limitation of S-LDSC is that for individual SNPs as opposed to annotations, its per-SNP heritability  
143 estimates are unreliable, and in particular often negative. Weissbrod *et al.* proposed a procedure that led  
144 to well-calibrated per-SNP heritability estimates (which were used as valid prior causal probabilities in  
145 PolyFun), but the procedure requires re-fitting the S-LDSC after binning the SNPs, which is *ad hoc* and can  
146 be computationally intensive<sup>20</sup>. graphREML produces nonnegative per-SNP heritability estimates, which  
147 may be more reliable. We evaluated their calibration in our simulations involving different sample sizes  
148 and forms of model misspecification. We fit the graphREML model, used it to estimate the heritability of  
149 each SNP, and ranked SNPs by their estimated heritability. Then, we calculated the cumulative heritability  
150 explained by the top  $x\%$ , for  $x$  ranging from 0 to 100, of variants in our list, and compared this curve  
151 with our estimates. These curves were highly concordant overall, though the degree of concordance is  
152 reduced when the genetic architecture is sparse, when sample size is low or when the genetic architecture  
153 is MAF-dependent (**Figure 2, Supplementary Figure 10-11**).

154 To further evaluate the calibration of per-SNP heritability, we regressed the estimated values onto  
155 the true values, constraining the intercept to be 0. The slope estimate from these regressions are  
156 close to 1, indicating a high degree of agreement between the estimated and true per-SNP heritability  
157 (**Supplementary Table 6**). We considered other approaches to assess the calibration of per-SNP heritability  
158 (**Online Methods**) and observed similar results (**Supplementary Figure 9-11**). These analyses indicates  
159 that for well-powered traits, variants with an estimated per-SNP heritability of some value  $x$  do indeed  
160 explain that much heritability on average.

161 Real summary statistics often contain a limited set of SNPs, for example the 1.1M HapMap 3 SNPs<sup>34</sup>.  
162 Missingness is potentially problematic in heritability enrichment analyses because when a missing causal  
163 variant in one annotation is in LD with a non-missing tag variant in a different annotation, its heritability  
164 might be misassigned. A particular advantage of S-LDSC is that it addresses this problem by explicitly  
165 modeling the LD of the "regression SNPs" via LD scores, which are computed based on a maximally  
166 comprehensive set of "reference SNPs". Other methods for partitioned heritability estimation, such as  
167 RSS<sup>30</sup> and GREML-LDMS<sup>35</sup>, cannot account for missingness or the mis-alignment between the set of  
168 variants with GWAS effect sizes and the set of variants with LD information. Our BaselineLD annotation  
169 matrices and LDGMs both contain a relatively comprehensive set of common SNPs; in particular, LDGMs  
170 contain most common SNPs in 1000 Genomes (MAF > 0.01;  $p = 8,392,958$  for Europeans).

171 graphREML handles missingness in the summary statistics by assigning, for every missing SNP, a  
172 "surrogate marker" SNP in high LD (**Online Methods**). The heritability of the missing SNP is assigned to  
173 its surrogate marker appropriately. To test this approach, we simulated different degrees of missingness,  
174 and applied graphREML with and without surrogate markers. With surrogate markers, graphREML  
175 enrichment estimates were highly robust even when up to 90% of SNPs were missing, at which point it was  
176 strongly biased without surrogate markers (**Supplementary Figure 12-13**). Total heritability estimates  
177 were robust with up to 30% missingness, and they were downwardly biased (even with surrogate markers)  
178 when missingness was 40% or greater (**Supplementary Figure 14**).

## 179 **Methods comparison on UK Biobank phenotypes**

180 On the basis of our simulation results, we expected that graphREML enrichment estimates would be  
181 concordant with those from S-LDSC on average, but that they would be less noisy, especially for traits  
182 with lower power. We analyzed UK Biobank summary statistics (average  $n = 451,069$  European-ancestry  
183 individuals) for 7 well-powered quantitative traits<sup>36,37</sup> as well as 11 less-well-powered disease phenotypes  
184 derived using the liability threshold family history model ("LTFH")<sup>4</sup> (**Supplementary Table 7**). We used  
185 a new set of LDGMs derived from UK Biobank data, closely matching the summary statistics; these  
186 LDGMs were highly accurate (**Supplementary Figure 15**). We applied both S-LDSC and graphREML



187 to estimate the heritability enrichment of six selected annotations (coding, conserved, DHS, enhancer,  
188 promoter and repressed), in a joint analysis including the 96 annotations of the baselineLD model derived  
189 from the UK Biobank<sup>8</sup>.

190 Because both graphREML and S-LDSC were approximately unbiased in simulations, we expected that  
191 they produce concordant enrichment estimates on average across traits. We meta-analyzed 7 well-powered  
192 quantitative traits and the 11 disease traits, and found that indeed, the enrichment estimates were largely  
193 concordant between the two methods, and the estimates from graphREML are much less variable than  
194 S-LDSC (**Figure 3a**). Moreover, the enrichments of individual (*i.e.*, as opposed to meta-analyzed) well-  
195 powered quantitative traits are similar as well (**Figure 3b**). For example, for height, coding variants had a  
196 heritability enrichment of 13.52 (*s.e.* = 2.47) with S-LDSC and 13.88 (*s.e.* = 1.83) for graphREML. The  
197 enrichment of variants in DHS are 3.56 (*s.e.* = 0.563) based on S-LDSC and 3.59 (*s.e.* = 0.214) based on  
198 graphREML.

199 For the less-well-powered LTFH phenotypes, S-LDSC and graphREML still produced similarly  
200 concordant estimates on average, but for individual diseases, their estimates diverged (**Figure 3b**). For  
201 example, for cardiovascular disease, repressed variants had a heritability enrichment of 0.58 from S-  
202 LDSC and 0.59 from graphREML, but the standard error from S-LDSC is more than three times larger  
203 (*s.e.* = 0.247) than that from graphREML (*s.e.* = 0.082). Thus, this annotation would be identified as  
204 significantly depleted by graphREML but not by S-LDSC. Another example is prostate cancer, for which  
205 the enrichment of enhancer variants was estimated to be 6.9 from both S-LDSC and graphREML, but the  
206 standard error estimates were 4.11 from S-LDSC vs. 2.66 from graphREML.

207 More generally, graphREML better prioritizes the functional categories that are expected to be  
208 significantly enriched (or depleted) due to its better statistical efficiency (**Figure 3c**). For instance,  
209 graphREML identifies both DHS variants ( $\times 2.17$ ,  $p = 4.42 \times 10^{-12}$ ) and promoters ( $\times 3.47$ ,  $p = 5.35 \times$   
210  $10^{-8}$ ) as highly significantly enriched for neuroticism. In contrast, S-LDSC produces noisy estimates  
211 for these two categories of SNPs –  $\times 0.78$  ( $p = 0.0724$ ) for DHS and 0.51 ( $p = 0.57$ ) for promoters,  
212 respectively. Across all trait-annotation pairs considered, 81 were statistically significant using graphREML

213 vs. 32 using S-LDSC (**Supplementary Table 8**). Reassuringly, all of the significant discoveries identified  
214 from S-LDSC and graphREML have the expected directions of enrichment/depletion.

215 Next, we performed a secondary analysis to assess the impact of missing SNPs on graphREML. Many  
216 GWAS report summary statistics for HapMap3 SNPs only, or some other limited set of SNPs, potentially  
217 leading to bias. To evaluate the effectiveness of surrogate markers when missingness is more severe, we  
218 applied graphREML to the subset of HapMap3 SNPs for the traits we studied above. Despite having  
219 almost 89% of missingness in the summary statistics, the enrichment analyses using HapMap3 SNPs only  
220 produced estimates that were highly concordant with those from using the full set of SNPs in UK Biobank.  
221 (**Figure 4a**). Furthermore, we found that accounting for the missing variants led to improved power  
222 compared to ignoring them, although the improvement was modest due to the low level of missingness in  
223 the UKB summary statistics (**Figure 4b**).

224 Lastly, we analyzed the UK Biobank traits using non-UK Biobank LDGMs derived from 1000  
225 Genomes European individuals. These enrichment estimates were concordant with those involving UKB-  
226 derived LDGM precision matrices, although power was reduced (**Supplementary Figure 17**). These  
227 results support the use of graphREML with out-of-sample LDGMs, and highlight the broad utility of  
228 graphREML for publicly available GWAS summary statistics.

## 229 **Validation of graphREML in non-UK Biobank datasets**

230 Most GWAS involve genotype data that is not publicly available, and they release summary association  
231 statistics but no in-sample LD information. Our method is derived under a model where the genotype  
232 matrix is random, with a population LD matrix that could potentially be estimated *out-of-sample*. We  
233 evaluated the performance of graphREML in such datasets, comparing its results with those obtained  
234 within UK Biobank. We identified non-UK Biobank, European-ancestry summary statistics for 12 of the  
235 traits analyzed above (average  $n = 235,331$ ; **Supplementary Table 9**). We additionally analyzed Biobank  
236 Japan summary statistics for 19 of the traits analyzed using European individuals and the LDGM precision  
237 matrices derived from East Asians in the 1000 Genome (average  $n = 91,045$ ; **Supplementary Table 10**).  
238 Most of these summary statistics were limited to HapMap3 SNPs (around 11% of those contained in the

239 LDGM).

240 Enrichment estimates were concordant between UK Biobank and non-UK Biobank summary statistics  
241 for the same traits (**Figure 5a-b, Supplementary Figure 21, Supplementary Table 11**), both across the 6  
242 annotations analyzed above and across a larger set of annotations having > 5% of SNPs (**Online Methods**).  
243 Well-powered quantitative traits had strongly concordant estimates; for example, the enrichment estimates  
244 for height based on UKB and non-UKB Europeans have a correlation of  $r^2 = 0.973$  with a mean enrichment  
245 across annotations of 4.89 and 4.99 based on UKB and non-UKB European GWAS, respectively. Less-  
246 well-powered disease traits had less concordant estimates, consistent with sampling error, but they were  
247 still concordant after meta-analyzing across traits (**Figure 5b**). These results also support the application  
248 of graphREML to estimate heritability enrichment in a sample which is potentially different from the  
249 LDGM sample.

250 Finally, we analyzed summary statistics from Biobank Japan in conjunction with LDGMs derived from  
251 East Asian individuals in 1000 Genomes. For most traits, estimates were concordant with those based  
252 on UK Biobank, including height and BMI (**Figure 5c-d**). For all seven blood traits or hematopoietic  
253 phenotypes in our study, enrichments in Biobank Japan were consistently smaller than those derived from  
254 European ancestry GWAS (**Supplementary Figure 22**). We observed similar results when comparing  
255 between East Asians and non-UKB Europeans (**Supplementary Figure 23, Supplementary Table 12-13**).

256 To remove the potentially large effect of the MHC/HLA region on the enrichments of hematopoietic  
257 phenotypes, we reran the analyses with the variants in the MHC/HLA region excluded. The enrichment es-  
258 timates were largely concordant when we included vs. excluded the HLA region. (**Supplementary Figure**  
259 **24**); the cross-ancestry comparison had a similar pattern with the HLA region excluded (**Supplementary**  
260 **Figure 25**). Together, these estimates are consistent with previous studies finding a high cross-population  
261 genetic correlation between European and East Asian populations<sup>38–40</sup>. They support the notion that  
262 different ancestry groups have differences in their allele frequencies and LD patterns, leading to different  
263 GWAS results, but that the underlying biology (in particular, function architecture) is mostly shared.

## 264 **A fast test for heritability enrichment**

265 In many studies, a large number of annotations are tested for heritability enrichment, conditional on the  
266 same baseline annotations<sup>5,41–43</sup>. Using a Wald test to obtain the significance of a conditional enrichment  
267 requires refitting graphREML multiple times, with the annotation of interest swapped in and out. This is  
268 analogous to the heritability enrichment analyses of specifically expressed genes (SEG) using S-LDSC,  
269 where a separate regression is ran for each SEG annotation and inference is performed on the regression  
270 coefficient on the SEG annotation<sup>5</sup>. While the regression step of S-LDSC is fast, estimating the enrichment  
271 of a new annotation requires calculating a new set of LD scores first, which is not computationally trivial.

272 We derived a fast test for heritability enrichment, graphREML-ST, that circumvents the need of refitting  
273 graphREML or computing the LD scores for each new annotation, conditional upon a shared null model  
274 (**Online Methods**). The main advantage of this procedure is that it is based on a score test, and hence only  
275 requires running graphREML once to fit the null model (**Online Methods**). The test is computationally  
276 efficient, with runtime linear in the number of markers (**Supplementary Notes**).

277 We evaluated the performance of the score test in simulations (**Online Methods**). We first assessed the  
278 type I error rate and the power of the score test. We found that the false positive rate is well-controlled  
279 across different genetic architectures with varying degree of polygenicity (**Supplementary Table 14**).  
280 Moreover, the score test has sufficient statistical power to detect true enrichment under a range of realistic  
281 generative models (**Supplementary Table 15**). We also compared the inference results based on the Wald  
282 test versus the score test from the real-trait enrichment analyses of 8 quantitative and 12 disease phenotypes  
283 in the UK Biobank (**Online Methods**). Reassuringly, we observed a high degree of concordance between  
284 the two set of inference results, with a Kendall's coefficient of concordance greater than 0.87 and 0.82  
285 for the marginal and joint enrichment, respectively (**Supplementary Table 16**). Taken together with the  
286 simulation results validating the Wald test (shown above), the agreement between the two tests lends  
287 support to using the score test as an optimal and robust approach to identify relevant annotations that are  
288 significantly enriched for a disease or trait.

289 This test is highly convenient for users because it allows them to test their new annotation for

290 enrichment against traits for which we have already run graphREML. They can do so without re-fitting  
291 graphREML to the summary statistics; they do not need to download LDGMs or even the original summary  
292 statistics. We have released the null fit from applying graphREML to the baseline LD annotations for a set  
293 of complex traits and diseases in the UK biobank (see data availability).

## 294 **Application of graphREML to the Abstract Mediation Model**

295 The abstract mediation model (AMM) is a model for the distance-dependent relationship between trait-  
296 associated variants and the genes that might mediate their effects. Under the assumption that all variant  
297 effects are mediated by some nearby gene, it quantifies the fraction of heritability that is mediated by the  
298 closest, second-closest, or  $k$ -th-closest genes. It leverages the proximity of SNPs to genes belonging to an  
299 enriched gene set to partition gene-mediated heritability.

300 AMM was previously paired with S-LDSC for estimation, because it requires an enrichment model that  
301 can handle overlapping annotations. As a result, its estimates are noisy. Consequently, the estimates have  
302 the limitations that they have low statistical efficiency, and are derived based on a linear assumption about  
303 the effect of an annotation on per-SNP heritability. To address these limitations, we apply graphREML  
304 to AMM to estimate the fraction of heritability mediated by the  $k$ -th nearest genes (**Online Methods**).  
305 Notably, we adopt a flexible mapping to relax the linear assumption on the relationship between the  
306 annotation values of a SNP and its per-SNP heritability. We also allow the background heritability of  
307 a SNP (*i.e.*, per-SNP heritability if no nearby genes lies in the gene set) to depend on its functional  
308 annotations. Denote by  $p^{(k)}$  the proportion of the total heritability mediated by the  $k$ -th nearest genes. To  
309 increase power and to ensure the stability of our estimates of the  $p^{(k)}$  estimates, we bin the gene proximity  
310 annotations, and perform meta-analyses across traits (**Online Methods**).

311 In simulations, we verified that the  $p^{(k)}$  estimates are approximately unbiased under different sample  
312 sizes and misspecified genetic architectures (**Supplementary Table 17**). We observed slight downward  
313 bias for the true non-null bins and upward bias for the true null bins. We emphasize that such biases  
314 are expected as we use a non-negative estimator of  $p^{(k)}$  with the implicit constraints that  $p^{(k)} > 0$  and  
315  $\sum_k p^{(k)} = 1$ . We next applied graphREML in conjunction with AMM to estimate  $p^{(k)}$  for the same

316 set of traits as we used to validate graphREML using real-trait data. We found that the  $p^{(k)}$  estimates  
317 are largely consistent with those reported in the previous study, with the closest and the 2nd closest  
318 gene mediating approximately 22.9% and 9.9% of the SNP-heritability in meta-analyses (**Figure 6a**,  
319 **Supplementary Table 19**). Notably, our estimates are more precise than those reported in the original  
320 AMM, even with fewer traits used for meta-analyses<sup>29</sup>. For instance, the standard errors of  $p^{(1)}$  and  $p^{(2)}$   
321 from meta-analyzing 15 traits using the graphREML enrichments are 2.91% and 2.32%, whereas those  
322 from meta-analyzing 47 traits using the S-LDSC enrichments are 6.37% and 3.79%, respectively. We  
323 observed large variation in the  $p^{(k)}$  estimates across traits; in particular, these estimates are more precise  
324 for well-powered and polygenic traits (**Figure 6b-c**, **Supplementary Table 18**). For well powered traits,  
325 graphREML can produce precise estimates of  $p^{(k)}$  for each *individual* trait, whereas such estimates were  
326 not reported in Weiner *et al.* due to lack of power.

## 327 Discussion

328 Heritability enrichment analysis has been one of the most valuable approaches to understand genetic  
329 architecture and to link functional genomic datasets with disease genetics. Here we proposed a new  
330 summary statistics-based approach and demonstrated through extensive simulations and real-trait analyses  
331 that compared to existing methods, graphREML has significantly improved statistical efficiency and power  
332 for enrichment analyses, and is robust to mismatches between the summary statistics and LD.

333 Model-based estimates of heritability and heritability enrichment can be biased due to misspecification  
334 of the assumed heritability model<sup>7,15,28,32</sup>. graphREML can be used to fit essentially any heritability  
335 model, notably including the baselineLD model, which includes a set of annotations that are designed to  
336 account for LD-dependent and frequency-dependent architecture, and which has been extensively validated  
337 using S-LDSC. These phenomena should affect graphREML and S-LDSC similarly, and indeed, both  
338 methods produce concordant estimates under the baselineLD model (**Figure 3a**). A completely different  
339 approach is to eschew the use of any heritability model, treating genetic effects as fixed; this approach  
340 is impervious to misspecification-related bias, but it has not been successfully applied to heritability

341 partitioning with overlapping annotations<sup>44,45</sup>.

342 Two other types of model misspecification are non-infinitesimal effect sizes and misspecified link  
343 functions. Bayesian methods such as RSS-NET explicitly models the null effects through its specification  
344 of the prior<sup>46</sup>. In contrast, graphREML assumes a Gaussian likelihood, similar to that of GCTA. Though  
345 our simulation results support the application of graphREML to non-infinitesimal architectures, further  
346 research is needed to study the impact of a sparse architecture on enrichment estimation. We proposed  
347 using a non-negative link function to map the annotation vector of a genetic marker to its per-SNP  
348 heritability. While our results suggest that the softmax function leads to well-calibrated estimates and is  
349 generally robust to model misspecification, future research is needed to improve the modeling of per-SNP  
350 heritability, in particular the form of the link function. For example, one can develop a data-adaptive  
351 procedure to select the most appropriate link systematically.

352 Another important source of bias when estimating heritability is assortative mating<sup>47</sup>, which causes  
353 long-range correlations between trait associated variants, magnifying their marginal effects. Assortative  
354 mating is expected to affect total heritability estimates more strongly than it does enrichment estimates.  
355 However, cross-trait assortative mating<sup>48</sup> would affect graphREML-estimated enrichments to the extent  
356 that the pattern of enrichment varies between the traits under assortment. This bias is expected to be  
357 similar for any heritability estimator that does not model assortative mating explicitly.

358 The likelihood of the marginal summary statistics we use in graphREML has been used in other  
359 methods as well. One such method is High-Definition Likelihood ("HDL")<sup>17</sup>, which estimates the genetic  
360 correlation between two traits with higher statistical efficiency than cross-trait LDSC. A possible extension  
361 of graphREML would be to partitioned genetic correlation. Another is "Regression with Summary  
362 Statistics (RSS)<sup>30</sup>," which estimates heritability but does not allow for overlapping annotations; moreover,  
363 it operates on a limited set of SNPs due to computational limitations. We recently developed a likelihood-  
364 based estimator, HEELS, which is approximately equivalent to individual-level REML estimator, again  
365 operating on a limited set of SNPs and not allowing for annotation overlap. A key difference between  
366 the two methods is that HEELS requires *in-sample* LD whereas graphREML can incorporate LDGM

367 precision matrices that are estimated either in-sample or out-of-sample<sup>25</sup>. For precise total heritability  
368 estimation, we recommend using HEELS when in-sample LD information is available.

369 It is worth noting that because graphREML cannot distinguish polygenic effects from confounding  
370 due to population stratification, it requires the S-LDSC intercept as an input to correct for confounding.  
371 Nevertheless, we observed largely consistent heritability enrichment estimates when we ignored population  
372 stratification (*i.e.*, fixing the intercept at 1 instead of the S-LDSC estimated intercept) (**Supplementary**  
373 **Figure 26**). Another limitation of graphREML in comparison with S-LDSC is that it is much slower, with  
374 a runtime on the order of hours vs. minutes (**Supplementary Table 20**). This makes it less well-suited  
375 for exploratory analyses involving hundreds of traits and annotations. graphREML-ST can alleviate this  
376 limitation to the extent that when a large number of annotations need to be tested conditional on a shared  
377 set of annotations, one only needs to run graphREML once for the null fit and apply score test to the new  
378 annotations, which only takes a few seconds. Another potential approach to improve the graphREML  
379 runtime would be stochastic optimization, where each update is computed from a subset of the genome.

380 Increasingly, genomic datasets resolve subtle differences between cell types, between nearby SNPs,  
381 across time points, and within tissues. With such an increasing resolution, these datasets will require  
382 powerful methods to prioritize disease-relevant mechanisms. The statistical efficiency of graphREML can  
383 be leveraged, in conjunction with high-resolution functional data, to identify highly specific features of  
384 disease biology.



## 385 **References**

- 386 **1.** Zhou, H. *et al.* Favor: functional annotation of variants online resource and annotator for variation  
387 across the human genome. *Nucleic Acids Res.* **51**, D1300–D1311 (2023).
- 388 **2.** Gusev, A. *et al.* Partitioning heritability of regulatory and cell-type-specific variants across 11 common  
389 diseases. *The Am. J. Hum. Genet.* **95**, 535–552 (2014).
- 390 **3.** Finucane, H. K. *et al.* Partitioning heritability by functional annotation using genome-wide association  
391 summary statistics. *Nat. genetics* **47**, 1228–1235 (2015).
- 392 **4.** Hujoel, M. L., Gazal, S., Hormozdiari, F., van de Geijn, B. & Price, A. L. Disease heritability enrich-  
393 ment of regulatory elements is concentrated in elements with ancient sequence age and conserved  
394 function across species. *The Am. J. Hum. Genet.* **104**, 611–624 (2019).
- 395 **5.** Finucane, H. K. *et al.* Heritability enrichment of specifically expressed genes identifies disease-  
396 relevant tissues and cell types. *Nat. genetics* **50**, 621–629 (2018).
- 397 **6.** Hormozdiari, F. *et al.* Leveraging molecular quantitative trait loci to understand the genetic architecture  
398 of diseases and complex traits. *Nat. genetics* **50**, 1041–1047 (2018).
- 399 **7.** Gazal, S. *et al.* Linkage disequilibrium–dependent architecture of human complex traits shows action  
400 of negative selection. *Nat. genetics* **49**, 1421–1427 (2017).
- 401 **8.** Gazal, S. *et al.* Functional architecture of low-frequency variants highlights strength of negative  
402 selection across coding and non-coding annotations. *Nat. genetics* **50**, 1600–1607 (2018).
- 403 **9.** Schoech, A. P. *et al.* Quantification of frequency-dependent genetic architectures in 25 uk biobank  
404 traits reveals action of negative selection. *Nat. communications* **10**, 790 (2019).
- 405 **10.** Zeng, J. *et al.* Signatures of negative selection in the genetic architecture of human complex traits.  
406 *Nat. genetics* **50**, 746–753 (2018).
- 407 **11.** Wainschein, P. *et al.* Assessing the contribution of rare variants to complex trait heritability from  
408 whole-genome sequence data. *Nat. Genet.* **54**, 263–273 (2022).

- 409 **12.** Weiner, D. J. *et al.* Polygenic architecture of rare coding variation across 394,783 exomes. *Nature*  
410 **614**, 492–499 (2023).
- 411 **13.** Bulik-Sullivan, B. K. *et al.* Ld score regression distinguishes confounding from polygenicity in  
412 genome-wide association studies. *Nat. genetics* **47**, 291–295 (2015).
- 413 **14.** Yang, J. *et al.* Common snps explain a large proportion of the heritability for human height. *Nat.*  
414 *genetics* **42**, 565–569 (2010).
- 415 **15.** Speed, D., Hemani, G., Johnson, M. R. & Balding, D. J. Improved heritability estimation from  
416 genome-wide snps. *The Am. J. Hum. Genet.* **91**, 1011–1021 (2012).
- 417 **16.** Loh, P.-R. *et al.* Contrasting genetic architectures of schizophrenia and other complex diseases using  
418 fast variance-components analysis. *Nat. genetics* **47**, 1385 (2015).
- 419 **17.** Ning, Z., Pawitan, Y. & Shen, X. High-definition likelihood inference of genetic correlations across  
420 human complex traits. *Nat. genetics* **52**, 859–864 (2020).
- 421 **18.** Benner, C. *et al.* Prospects of fine-mapping trait-associated genomic regions by using summary  
422 statistics from genome-wide association studies. *The Am. J. Hum. Genet.* **101**, 539–551 (2017).
- 423 **19.** Wen, X. & Stephens, M. Using linear predictors to impute allele frequencies from summary or pooled  
424 genotype data. *The annals applied statistics* **4**, 1158 (2010).
- 425 **20.** Weissbrod, O. *et al.* Functionally informed fine-mapping and polygenic localization of complex trait  
426 heritability. *Nat. Genet.* **52**, 1355–1363 (2020).
- 427 **21.** Vilhjálmsson, B. J. *et al.* Modeling linkage disequilibrium increases accuracy of polygenic risk scores.  
428 *The american journal human genetics* **97**, 576–592 (2015).
- 429 **22.** Shi, H., Kichaev, G. & Pasaniuc, B. Contrasting the genetic architecture of 30 complex traits from  
430 summary association data. *The Am. J. Hum. Genet.* **99**, 139–153 (2016).
- 431 **23.** Shi, H., Mancuso, N., Spendlove, S. & Pasaniuc, B. Local genetic correlation gives insights into the  
432 shared genetic architecture of complex traits. *The Am. J. Hum. Genet.* **101**, 737–751 (2017).

- 433 **24.** Song, S., Jiang, W., Zhang, Y., Hou, L. & Zhao, H. Leveraging ld eigenvalue regression to improve  
434 the estimation of snp heritability and confounding inflation. *The Am. J. Hum. Genet.* (2022).
- 435 **25.** Li, H., Mazumder, R. & Lin, X. Accurate and efficient estimation of local heritability using summary  
436 statistics and the linkage disequilibrium matrix. *Nat. Commun.* **14**, 7954 (2023).
- 437 **26.** Salehi Nowbandegani, P. *et al.* Extremely sparse models of linkage disequilibrium in ancestrally  
438 diverse association studies. *Nat. Genet.* **55**, 1494–1502 (2023).
- 439 **27.** Kelleher, J. *et al.* Inferring whole-genome histories in large population datasets. *Nat. genetics* **51**,  
440 1330–1338 (2019).
- 441 **28.** Speed, D. & Balding, D. J. Sumher better estimates the snp heritability of complex traits from  
442 summary statistics. *Nat. genetics* **51**, 277–284 (2019).
- 443 **29.** Weiner, D. J., Gazal, S., Robinson, E. B. & O’Connor, L. J. Partitioning gene-mediated disease  
444 heritability without eqtls. *The Am. J. Hum. Genet.* **109**, 405–416 (2022).
- 445 **30.** Zhu, X. & Stephens, M. Bayesian large-scale multiple regression with summary statistics from  
446 genome-wide association studies. *The annals applied statistics* **11**, 1561 (2017).
- 447 **31.** McCullagh, P. & Nelder, J. *Generalized linear models* (Routledge, 1989).
- 448 **32.** Gazal, S., Marquez-Luna, C., Finucane, H. K. & Price, A. L. Reconciling s-ldsc and ldak functional  
449 enrichment estimates. *Nat. genetics* **51**, 1202–1204 (2019).
- 450 **33.** Tashman, K. C., Cui, R., O’Connor, L. J., Neale, B. M. & Finucane, H. K. Significance testing for  
451 small annotations in stratified ld-score regression. *medRxiv* 2021–03 (2021).
- 452 **34.** Consortium, I. H. . *et al.* Integrating common and rare genetic variation in diverse human populations.  
453 *Nature* **467**, 52 (2010).
- 454 **35.** Yang, J. *et al.* Genetic variance estimation with imputed variants finds negligible missing heritability  
455 for human height and body mass index. *Nat. genetics* **47**, 1114–1120 (2015).

- 456 **36.** Loh, P.-R. *et al.* Efficient bayesian mixed-model analysis increases association power in large cohorts.  
457 *Nat. genetics* **47**, 284–290 (2015).
- 458 **37.** UKB GWAS of everything release 2 (August 1, 2018). <http://www.nealelab.is/uk-biobank>. Accessed:  
459 2023-01-01.
- 460 **38.** Luo, Y. *et al.* Estimating heritability and its enrichment in tissue-specific gene sets in admixed  
461 populations. *Hum. molecular genetics* **30**, 1521–1534 (2021).
- 462 **39.** Brown, B. C., Ye, C. J., Price, A. L. & Zaitlen, N. Transethnic genetic-correlation estimates from  
463 summary statistics. *The Am. J. Hum. Genet.* **99**, 76–88 (2016).
- 464 **40.** Shi, H. *et al.* Population-specific causal disease effect sizes in functionally important regions impacted  
465 by selection. *Nat. communications* **12**, 1098 (2021).
- 466 **41.** Trubetskoy, V. *et al.* Mapping genomic loci implicates genes and synaptic biology in schizophrenia.  
467 *Nature* **604**, 502–508 (2022).
- 468 **42.** Sakaue, S. *et al.* A cross-population atlas of genetic associations for 220 human phenotypes. *Nat.*  
469 *genetics* **53**, 1415–1424 (2021).
- 470 **43.** Howard, D. M. *et al.* Genome-wide meta-analysis of depression identifies 102 independent variants  
471 and highlights the importance of the prefrontal brain regions. *Nat. neuroscience* **22**, 343–352 (2019).
- 472 **44.** Hou, K. *et al.* Accurate estimation of snp-heritability from biobank-scale data irrespective of genetic  
473 architecture. *Nat. genetics* **51**, 1244–1251 (2019).
- 474 **45.** Ma, R. & Dicker, L. H. The mahalanobis kernel for heritability estimation in genome-wide association  
475 studies: fixed-effects and random-effects methods. *arXiv preprint arXiv:1901.02936* (2019).
- 476 **46.** Zhu, X., Duren, Z. & Wong, W. H. Modeling regulatory network topology improves genome-wide  
477 analyses of complex human traits. *Nat. communications* **12**, 2851 (2021).
- 478 **47.** Border, R. *et al.* Assortative mating biases marker-based heritability estimators. *Nat. communications*  
479 **13**, 660 (2022).

- 480 **48.** Border, R. *et al.* Cross-trait assortative mating is widespread and inflates genetic correlation estimates.  
481 *Science* **378**, 754–761 (2022).
- 482 **49.** Conneely, K. N. & Boehnke, M. So many correlated tests, so little time! rapid adjustment of p values  
483 for multiple correlated tests. *The Am. J. Hum. Genet.* **81**, 1158–1168 (2007).
- 484 **50.** Campbell, Y. E. & Davis, T. A. Computing the sparse inverse subset: an inverse multifrontal approach.  
485 *Univ. Florida, Tech. Rep. TR-95-021* (1995).
- 486 **51.** Chen, Y., Davis, T. A., Hager, W. W. & Rajamanickam, S. Algorithm 887: Cholmod, supernodal  
487 sparse cholesky factorization and update/downdate. *ACM Transactions on Math. Softw. (TOMS)* **35**,  
488 1–14 (2008).
- 489 **52.** Davis, T. A. & Hager, W. W. Dynamic supernodes in sparse cholesky update/downdate and triangular  
490 solves. *ACM Transactions on Math. Softw. (TOMS)* **35**, 1–23 (2009).

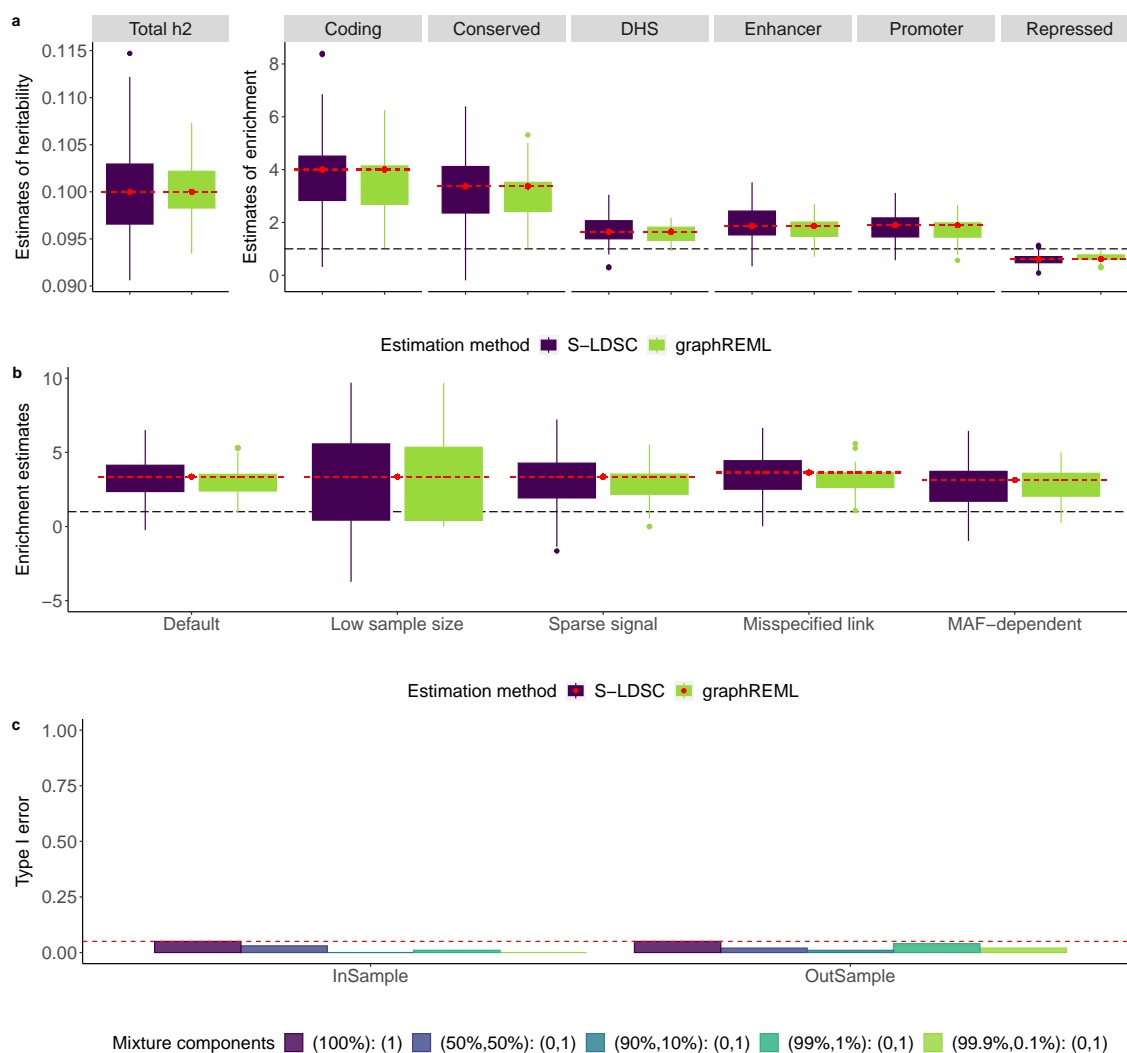

**Figure 1. Performance of graphREML in simulation studies.** Summary statistics are directly simulated based on the LDGM precision matrices on chromosome 1 from the Europeans in 1000 Genome ( $p = 513,012$ ). **a.** Comparison of heritability and enrichment estimates between S-LDSC and graphREML under the infinitesimal model,  $n = 100,000$ . **b.** The enrichment estimates of conserved SNPs across different scenarios of model misspecifications and sample size. Low sample size:  $n = 10,000$ ; Sparse signal: 0.1% of SNPs are causal; misspecified link: use the max function to simulate genetic variances; MAF-dependent: assume the per-SNP heritability is proportional to  $(f_j(1 - f_j))^{1+\alpha}$ , where  $\alpha = -0.25$  and  $f_j$  is the allele frequency of SNP  $j$ . The results for the complete set of model misspecifications and for other functional annotations (*e.g.*, coding) are reported in **Supplementary Table 3-5**. In panels **a** and **b**, the red dashed lines represent the true values of heritability enrichment; the black long dashed lines represent null or an enrichment of one. The box plots for the "Low sample size" setting in panel **b** are truncated due to the large variation of the estimates. **c.** Type I error rate of the joint enrichment estimates from graphREML. Y-axis is the proportion of true nulls that have been falsely rejected. The null annotation is DHS (18.9% of SNPs). InSample and OutSample indicate whether the LDGMs are matched with the summary statistics. The red dashed line is the level used for testing 0.05.

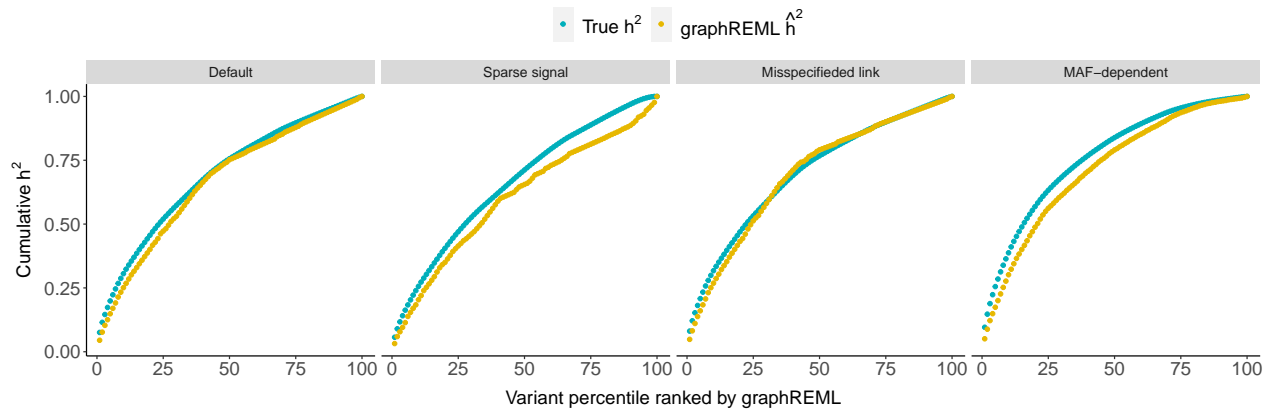

**Figure 2. Calibration of per-SNP heritability from graphREML in simulations.** Summary statistics are directly simulated based on the LDGM precision matrices on chromosome 1 from the Europeans in 1000 Genome ( $p = 513,012$ ). Each dot represent the estimated or true heritability from the top  $k$  percentiles of SNPs. Default is the infinitesimal model with  $n = 100,000$ . Column panels represent different generative models or genetic architectures, similar to those defined in **Figure 1b**.

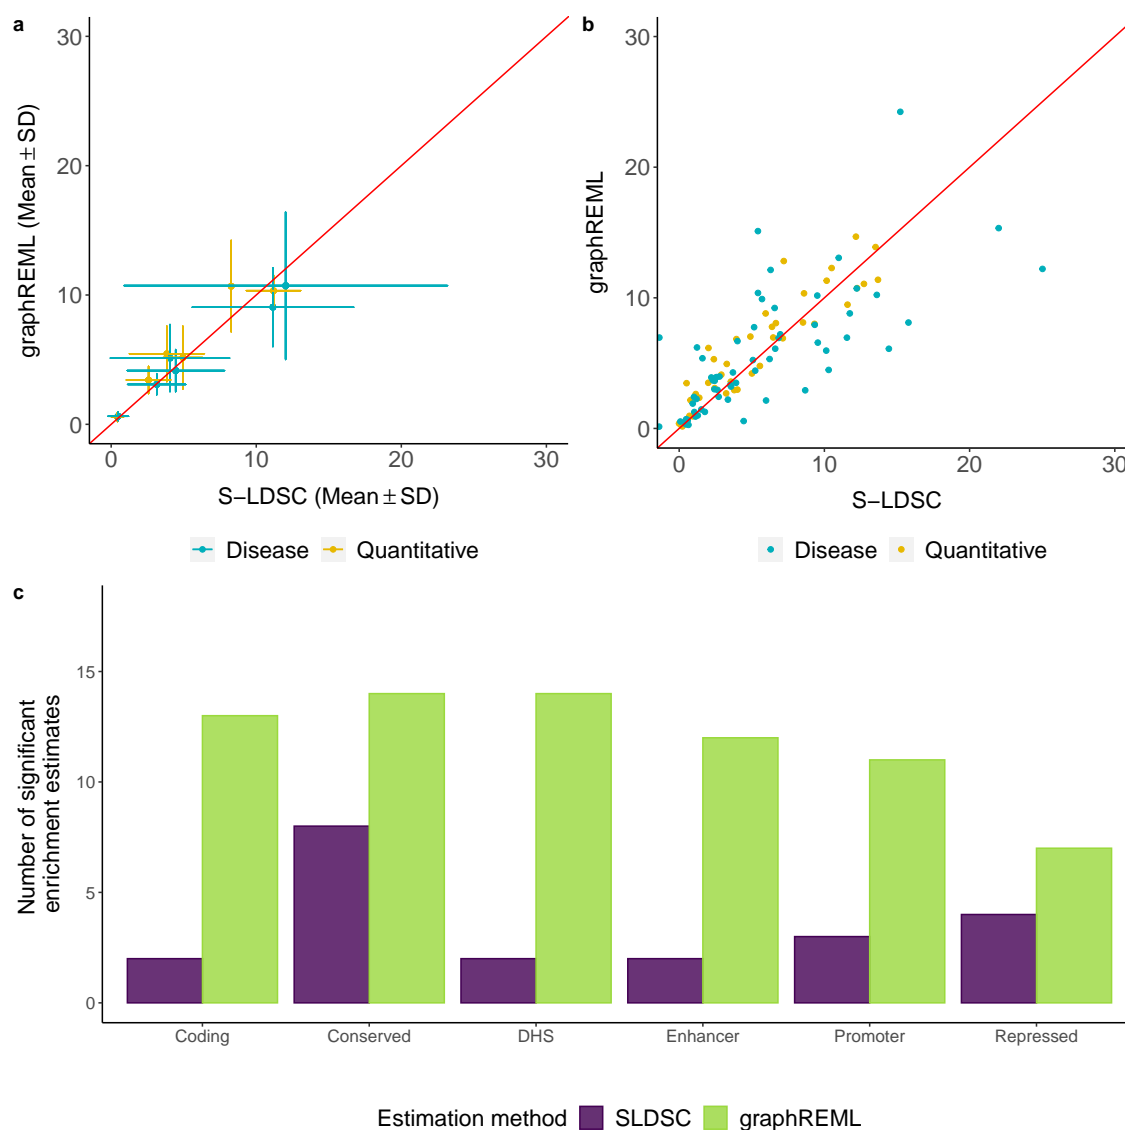

**Figure 3. Comparison of marginal enrichment estimates from real trait analyses using graphREML vs. S-LDSC.** Phenotypes are categorized into two groups: quantitative and disease, colored in yellow and blue respectively. The quantitative traits are generally better powered than the disease traits. Since the association statistics for the disease traits we use are based on the liability threshold model conditional on family history<sup>4</sup>, the disease traits are sufficiently well-powered as well. **a.** Marginal enrichment estimates from a meta-analysis of 18 traits based on the GWAS summary statistics in the UK Biobank. Error bars represent standard deviations (not standard errors) across traits. **b.** Marginal enrichment estimates for individual traits. The red reference line in panels **a** and **b** is the 45 degree line. **c.** Counts of significant enrichments identified by S-LDSC and graphREML across the 18 traits analyzed. Shown here are 81 significant trait-annotation pairs prioritized by graphREML vs. 32 pairs by S-LDSC. All significant enrichments identified by graphREML and S-LDSC have the correct direction (enrichment vs. depletion). The full set of enrichment estimates from the comparison are reported in **Supplementary Table 8**.



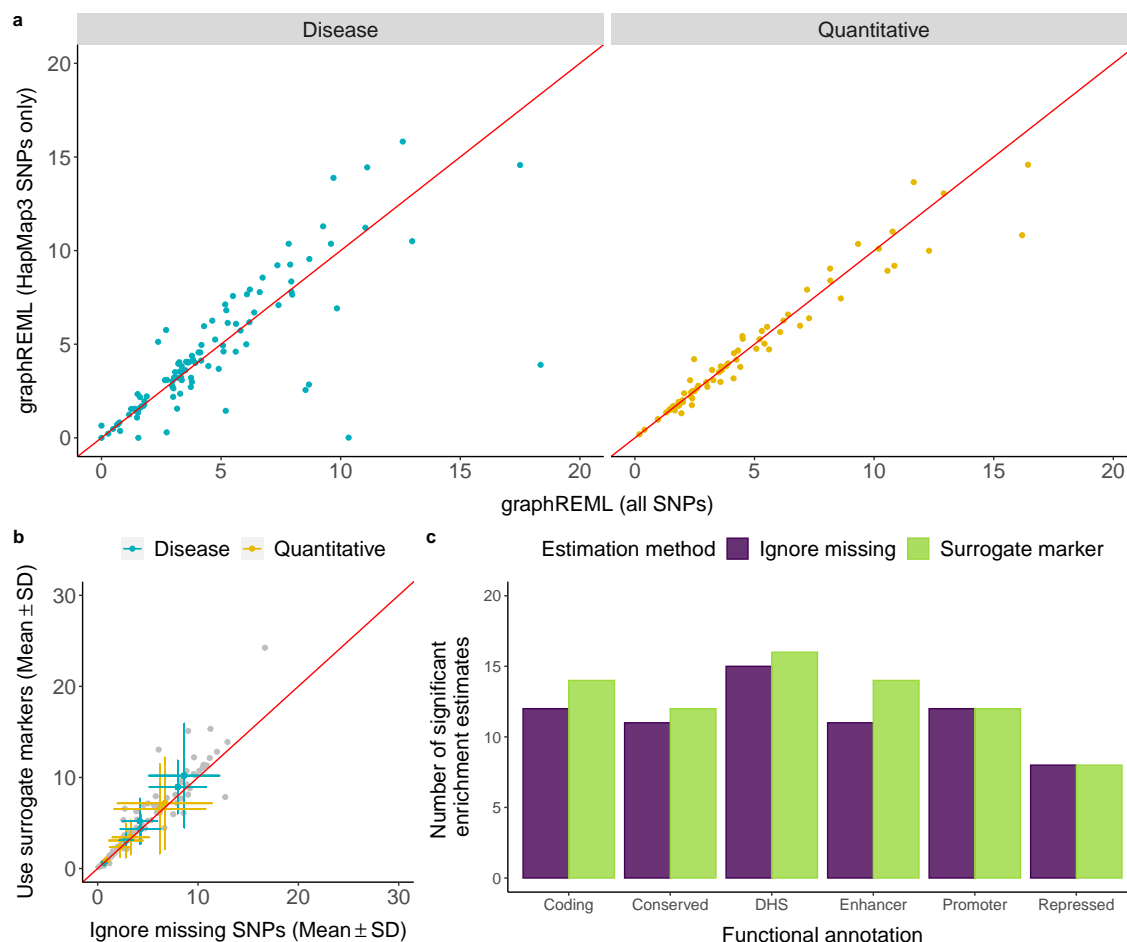

**Figure 4. Robustness of graphREML in the presence of missing SNPs.** The set of phenotypes is the same as those used for method comparison in **Figure 3**. **a**. Comparison of the enrichment estimates when the full set of SNPs (x-axis) vs. HapMap3 only (y-axis) are included in the summary statistics. Approximately 89% of the SNPs in the full summary statistics are not HapMap3 SNPs. **b**. Enrichment estimates from meta-analyses of 18 traits from GWAS in the UK Biobank when ignoring the missing SNPs (x-axis) vs. when accounting for the missing SNPs using surrogate markers (y-axis). Approximately 17.82% of the SNPs in the UKB summary statistics are missing in the LDGMs (UKB-based). Gray dots represent the enrichment estimates for specific trait-annotation pairs. Phenotypes are categorized into two groups: well-powered traits and low-powered traits, colored in yellow and blue respectively. The lines represent SD within each group. The red reference line is the 45 degree line. **c**. Counts of significant enrichment/depletion identified by graphREML when accounting for the missing SNPs via surrogate marker vs. ignoring the missing SNPs.

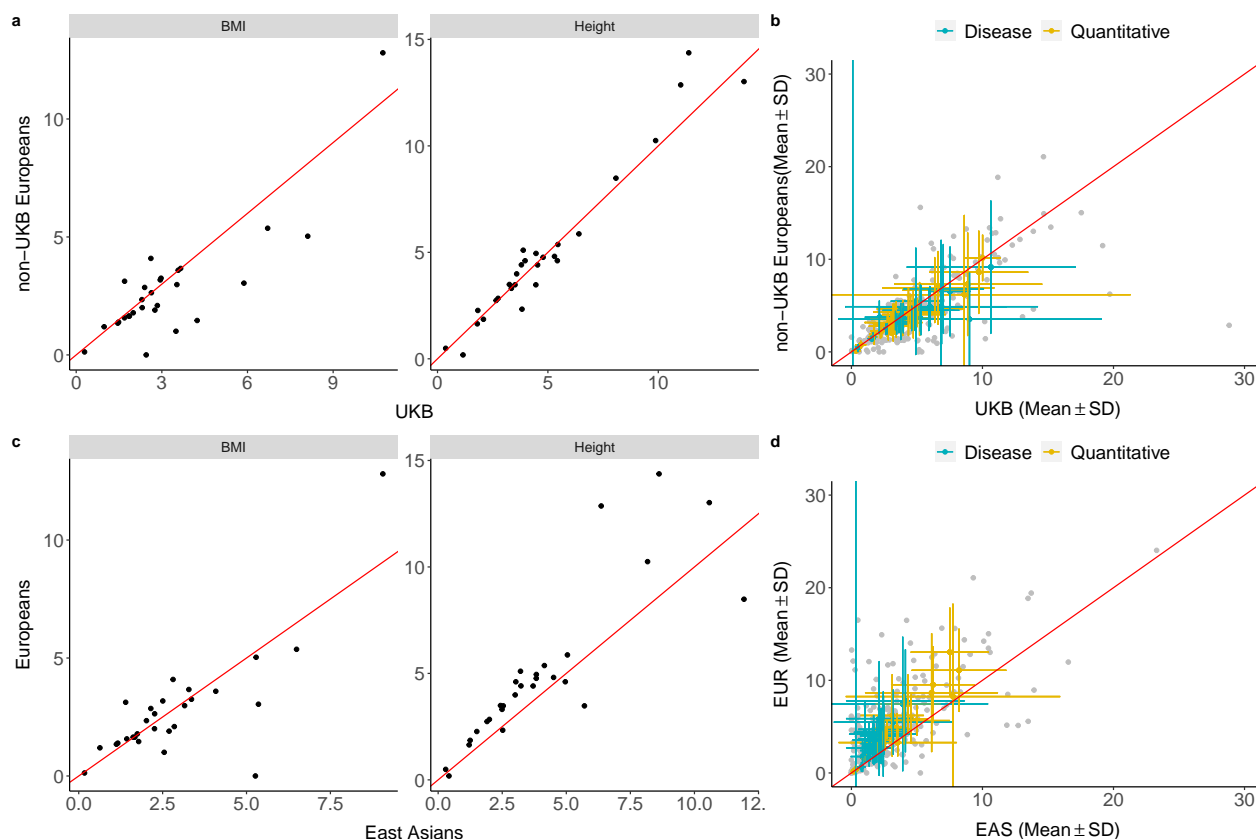

**Figure 5. Validation of graphREML in non-UK Biobank datasets.** **a.** Enrichment estimates from applying graphREML to GWAS for BMI and height in UKB or non-UKB Europeans. LDGM precision matrices derived from the UKB are used. **b.** Meta-analysis results from applying graphREML to 12 traits with both UKB and non-UKB summary statistics. The red reference line is the 45 degree line. The full set of enrichment estimates are reported in **Supplementary Table 11**. **c.** Enrichment estimates from applying graphREML to BMI and Height GWAS based on Biobank Japan (BBJ) and UKB. LDGM precision matrices derived from UKB and 1000 Genomes East Asians are used with UKB and BBJ GWAS respectively. **d.** Meta-analysis results from applying graphREML to 11 traits with both UKB and BBJ summary statistics. The red reference line is the 45 degree line. The full set of enrichment estimates are reported in **Supplementary Table 13**.

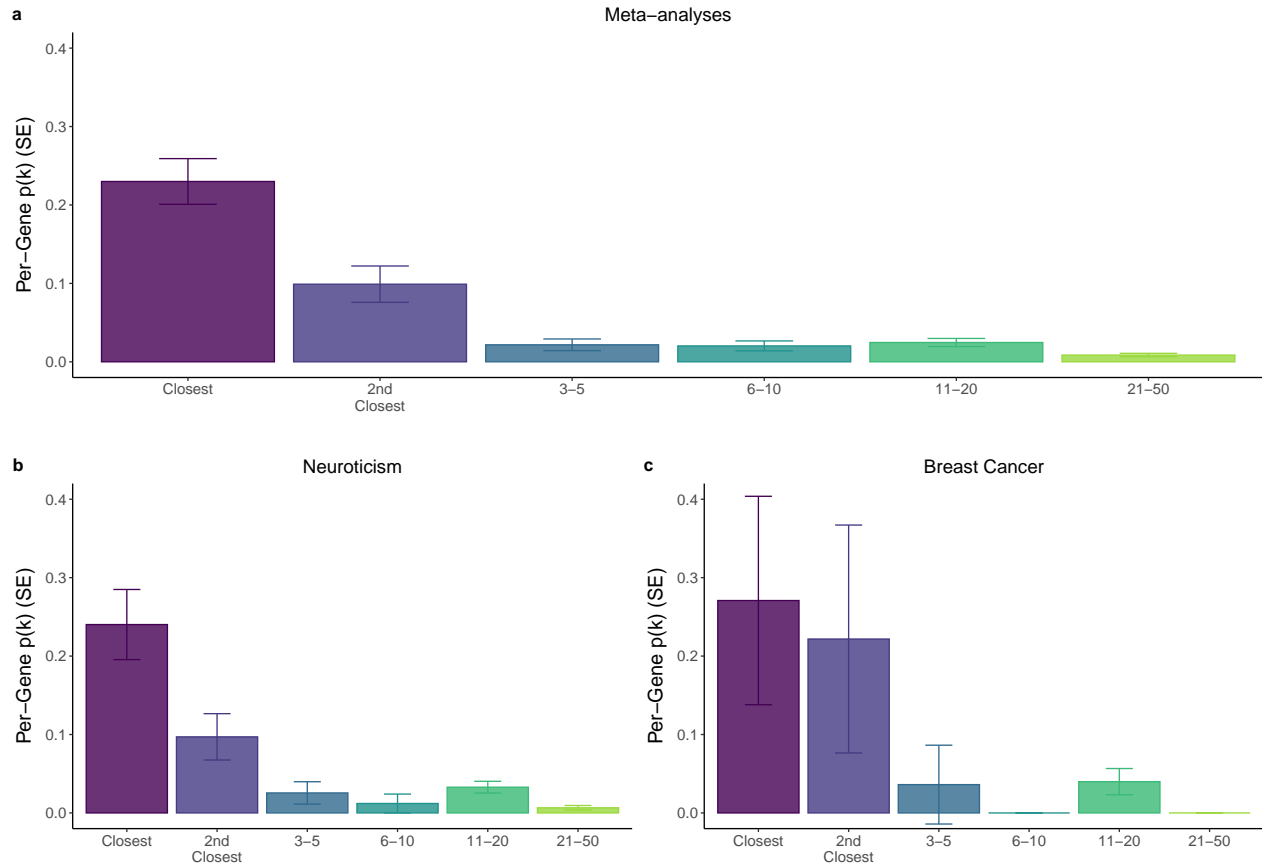

**Figure 6. Application of graphREML to the Abstract Mediation Model (AMM).** Fraction of mediated heritability across gene-proximity bins estimated with the constrained gene set ( $pLI \geq 0.9$ ). The estimate of  $p^{(k)}$  is the average for genes in that bin; per-bin  $p^{(k)}$  multiplied by the number of genes in the bin, summed across bins, equals 100% of heritability. Error bars represent standard errors from jackknife. **a.** Meta-analyzed estimates across traits, weighted by the precision of excess heritability ( $\tau_A$ ). **b** and **c.**  $p^{(k)}$  estimates for two individual traits: neuroticism and breast cancer. The numerical results for all panels are reported in **Supplementary Table 18-19**.

## 491 Online Methods

### 492 Statistical model

493 Let  $\mathbf{y}$  be a length- $n$  vector that denotes the phenotypes of  $n$  samples. Denote by  $\mathbf{X} \in \mathbb{R}^{n \times p}$  the genotype  
494 matrix of  $n$  individuals based on  $p$  markers or SNPs. We standardize  $\mathbf{X}$  and  $\mathbf{y}$  such that the variance of  
495 the phenotype is 1 and the variance of each marker-specific genotype vector is 1. We adopt the standard  
496 assumptions of genetic association modeling, and use an additive genetic model for the phenotypes as  
497  $\mathbf{y} = \mathbf{X}\boldsymbol{\beta} + \boldsymbol{\varepsilon}$ , where both  $\mathbf{X}$  and  $\boldsymbol{\beta}$  are assumed to be random. We define the population LD matrix as  
498  $\boldsymbol{\Sigma} \equiv \mathbb{E}(\mathbf{X}^\top \mathbf{X}/n)$ , and we assume the true effect sizes are drawn from  $\boldsymbol{\beta} \sim N(0, \mathbf{D}(\boldsymbol{\theta}))$ , similar to Yang  
499 *et al.*<sup>14</sup>,  $\boldsymbol{\theta}$  is the set of parameters that determine the genetic architecture of a trait. For example,  $\boldsymbol{\theta}$   
500 can include the total heritability of a trait; it can also include the set of enrichment coefficients for the  
501 functional annotations, *i.e.*,  $\boldsymbol{\tau}$ . The diagonal elements of  $\mathbf{D}(\boldsymbol{\theta})$  are the per-SNP heritability, which we  
502 model using the link function,  $g(\cdot)$ . We use the softmax by default in graphREML: for SNP  $j$ , we allow  
503 for a non-linear relationship between the annotation values of a SNP and its per-SNP heritability value,  
504 as described above,  $\sigma_j^2 = g^{-1}(\eta_j) = g^{-1}(\mathbf{a}_j^\top \boldsymbol{\tau})$ . We assume that the individual-specific noise is *i.i.d.*,  
505 following  $\boldsymbol{\varepsilon} \sim N(0, \sigma_e^2 \mathbf{I}_n)$ . Under this random-design random-effect model, the marginal association  
506 statistics,  $\mathbf{z}$ , is normally distributed with mean zero, and variance approximately equal to  $n\boldsymbol{\Sigma}\mathbf{D}(\boldsymbol{\theta})\boldsymbol{\Sigma} + \boldsymbol{\Sigma}$   
507 (**Supplementary Notes**,<sup>49</sup>).

508 Maximizing the likelihood of this model requires computationally expensive operations involving the  
509 LD matrix  $\boldsymbol{\Sigma}$ . We propose to approximate the likelihood using the LDGM precision matrix<sup>26</sup>,  $\mathbf{P}$ , which is  
510 a sparse matrix whose inverse approximates  $\boldsymbol{\Sigma}$ . We define transformed Z-statistics, *i.e.*,  $\tilde{\mathbf{z}} \equiv \mathbf{P}\mathbf{z}$ , whose  
511 likelihood is:

$$\ell(\boldsymbol{\theta}) \propto \tilde{\mathbf{z}}^\top (n\mathbf{D}(\boldsymbol{\theta}) + \mathbf{P})^{-1} \tilde{\mathbf{z}} + \log|n\mathbf{D}(\boldsymbol{\theta}) + \mathbf{P}| + c. \quad (1)$$

512 The graphREML estimator is defined as  $\hat{\boldsymbol{\theta}} = \arg \max_{\boldsymbol{\theta}} \ell(\boldsymbol{\theta})$ .

## 513 Estimation

We use the Newton-Raphson algorithm to maximize the likelihood function (1) and we exploit the sparse representation of  $\Sigma^{-1}$  with the LDGM precision matrices. We iteratively update our estimate of the parameters as the following,

$$\boldsymbol{\theta}^{(k+1)} = \boldsymbol{\theta}^{(k)} - (\mathbf{H}^{(k)} + e\mathbf{I})^{-1}\nabla^{(k)},$$

514 where  $\nabla^{(k)}$  and  $\mathbf{H}^{(k)}$  are the gradient and Hessian of the likelihood function evaluated at the current  
 515 estimate of the parameters  $\boldsymbol{\theta}^{(k)}$ .  $e$  is some small-valued number that is added to the diagonal of the Hessian  
 516 matrix to prevent singularity in estimation.

517 Let  $\mathbf{M}(\boldsymbol{\theta}^{(k)}) = n\mathbf{D}(\boldsymbol{\theta}^{(k)}) + \mathbf{P}$ . At each iteration, we first perform a Cholesky factorization of the matrix  
 518  $\mathbf{M}(\boldsymbol{\theta}^{(k)})$ , which is feasible and computationally tractable due to the sparsity of  $\mathbf{P}$ . Specifically, we use the  
 519 sparse matrix operations in MATLAB to efficiently obtain the Cholesky factors. The diagonal elements of  
 520  $\mathbf{D}(\boldsymbol{\theta})$  correspond to the true SNP-specific genetic variance, which are normalized such that they summed  
 521 up to the true total heritability. Denote by  $\frac{\partial \mathbf{D}_{\mathbf{a}}(\boldsymbol{\theta})}{\partial \theta_i}$  the diagonal matrix where the diagonal elements are the  
 522 partial derivatives of the per-SNP heritability with respect to the parameters,  $\left(\frac{\partial g^{-1}(a_1)}{\partial \theta_i}, \dots, \frac{\partial g^{-1}(a_p)}{\partial \theta_i}\right)$ . The  
 523 gradient is:

$$\nabla_i^{(k+1)} = \frac{1}{2}n \left[ \tilde{\mathbf{z}}^\top (\mathbf{M}^{(k)})^{-1} \frac{\partial \mathbf{D}_{\mathbf{a}}(\boldsymbol{\theta})}{\partial \theta_i} (\mathbf{M}^{(k)})^{-1} \tilde{\mathbf{z}} - \text{Tr} \left\{ \frac{\partial \mathbf{D}_{\mathbf{a}}(\boldsymbol{\theta})}{\partial \theta_i} (\mathbf{M}^{(k)})^{-1} \right\} \right], \quad (2)$$

524 where we have used  $\mathbf{M}^{(k)}$  to denote  $\mathbf{M}(\boldsymbol{\theta}^{(k)})$  for simplicity of notation, and  $i$  indexes the parameters. The  
 525 second term is computationally intensive to evaluate; for this, we calculate the sparse inverse subset<sup>50</sup>  
 526 using the *suitesparse* library in MATLAB<sup>51,52</sup>.

527 For the Hessian matrix, we apply the trace trick to compute the expected value of a quadratic  
 528 form and approximate the expected information using the observed information, similar to Loh et al.<sup>16</sup>  
 529 (**Supplementary Notes**). This leads to an approximation of the Hessian as,

$$\mathbf{H}_{il}^{(k+1)} \approx \frac{1}{2}n^2 \tilde{\mathbf{z}}^\top \left\{ (\mathbf{M}^{(k)})^{-1} \frac{\partial \mathbf{D}_{\mathbf{a}}(\boldsymbol{\theta})}{\partial \theta_i} (\mathbf{M}^{(k)})^{-1} \frac{\partial \mathbf{D}_{\mathbf{a}}(\boldsymbol{\theta})}{\partial \theta_l} (\mathbf{M}^{(k)})^{-1} \right\} \tilde{\mathbf{z}}, \quad (3)$$

530 where  $i$  and  $l$  index the parameters. We compute the inverse  $\mathbf{M}^{-1}$  in both equation (2) and (3) using  
531 the Cholesky factors described above. All computations are performed at LD-block level (the LDGM  
532 precision matrices are provided by LD block as well), which can be parallelized. We use the trust-region  
533 algorithm to control the step size of each update in a principled way, and employ an adaptive bound on  
534 the maximum change at each iteration (see Algorithm 1 in the **Supplementary Notes**). This allows us to  
535 balance between convergence speed and robustness of the updates. We apply other techniques to improve  
536 the computational efficiency of our algorithm. Notably, our calculations critically rely on the sparsity  
537 of the LDGMs, as we use sparse matrix operations for matrix multiplication, division, log-determinant  
538 and inverse (**Supplementary Notes**). It is possible to have multiple SNPs on the same LDGM node.  
539 graphREML chooses just of the SNPs with available summary statistics for a given node, and sum up the  
540 estimated per-SNP heritabilities across the SNPs that are assigned to the same node.

#### 541 **Standard error calibration**

542 We estimate the standard error of our estimates using an approximate jackknife estimator. Specifically, we  
543 compute a set of leave-one-LD-block-out scores (the score is the gradient of the log-likelihood function)  
544 at the optimum, after the Newton Raphson algorithm has completed. This amounts to performing one  
545 more NR update using all but one LD block. Such an approximation is appropriate because our variance  
546 estimator is most exact when it is evaluated at the true parameter value, and we expect our estimates to be  
547 close to the optimum upon completion of the Newton updates. We then use the empirical variance of these  
548 leave-one-LD-block-out parameter estimates as the jackknife covariance of the conditional enrichment  
549 coefficients,  $\tau$ . graphREML also produces the Huber-White sandwich estimator, where we plug in the  
550 empirical covariance of the scores across the LD blocks as the weight, sandwiched by inverse of the naive  
551 variance estimator which is the inverse of the negative Hessian. Both the jackknife estimator and the  
552 sandwich estimator of SE lead to well-controlled type I error rates except under very sparse architectures,  
553 *e.g.*, 0.1% causal (**Supplementary Figure 19-20**).

554 For inference on the marginal enrichment, we adopt an approach similar to S-LDSC, testing the  
555 significance of the difference rather than the ratio between the partitioned heritability in vs. out of an

556 annotation. We apply the Delta method to obtain the asymptotic variance of the enrichment test statistics  
557  $D_k$ , which are functions of the conditional enrichment estimates  $\tau$ . By default, graphREML reports  
558 inference results based on the jackknife estimator of SE, as it is slightly more conservative for the marginal  
559 enrichment under sparse architectures (**Supplementary Figure 8**). We apply the standard Benjamini-  
560 Hochberg procedure to correct for multiple hypothesis testing when prioritizing trait-annotation pairs,  
561 such that the false discovery rate (FDR) is less than 5%.

### 562 **Accounting for missing SNPs**

563 In practice, the sets of SNPs that are present in the summary statistics are almost always different from  
564 the set of SNPs with annotation and/or the LD information available. To address such missingness issue,  
565 graphREML assigns to each missing SNP a surrogate marker, selected as the non-missing SNP which has  
566 the highest LD with the missing SNP, and uses these surrogate markers in heritability enrichment estimation.  
567 Note that this procedure accounts for the set of SNPs that we have annotation and LD information for but  
568 are absent in the summary statistics. We cannot model or include SNPs with association statistics available  
569 but no annotation or LD information in the graphREML estimation. This latter type of missingness is not  
570 concerning because in practice, the set of SNPs that are included in the LDGM precision matrices and with  
571 annotation information is usually a superset of the common variants with available association statistics.

572 We note two important points about merging between variant-level data in real data analyses due to the  
573 imperfect alignment of the SNPs across datasets. First, we explicitly model the covariance of the effects  
574 of SNPs that overlap between the summary statistics and the LDGM nodes in modeling the per-SNP  
575 heritability. Due to the surrogate markers we assign to the missing SNPs, it is possible that one LDGM  
576 node is linked with multiple SNPs. In this case, we aggregate the per-SNP heritability of all of the SNPs on  
577 a given node. Second, it is possible for multiple SNPs to be assigned to the same LDGM node (*i.e.*, if their  
578 LD is almost perfect), in which case we retain all of the variants with available annotation information as  
579 opposed to randomly selecting one.

580 To evaluate the impact of SNP missingness in real data analyses, we first compared the enrichment  
581 estimates from applying graphREML with versus without accounting for missing SNPs, using summary

582 statistics in the UK Biobank. Since the proportion of missing SNPs is small in UK Biobank (especially if  
583 we use the LDGM precision matrices derived from the UK Biobank), we next applied graphREML to the  
584 subset of summary statistics that overlap with the HapMap3 SNPs. This led to approximately 1.2 million  
585 variants in the summary statistics and close to 89% missingness.

## 586 **Simulation studies**

587 We simulated summary statistics using the *simulateSumstats* function in the LDGM package (see Code  
588 Availability). To simulate the association statistics directly, we drew marginal effect size from the  
589 multivariate normal,  $N(0, n\mathbf{\Sigma D}(\boldsymbol{\theta})\mathbf{\Sigma})$ , where  $\mathbf{\Sigma}$  is the inverse of the LDGM precision matrix inferred from  
590 European individuals in the 1000 Genome or in the UK Biobank. We used the imputed common SNPs  
591 on Chromosome 1 ( $p = 513,012$  for 1000 Genome or  $p = 504,907$  for UK Biobank). We varied the  
592 form of  $\mathbf{D}(\boldsymbol{\theta})$  to (mis)specify different generative models and architectures. The diagonal elements of  
593  $\mathbf{D}(\boldsymbol{\theta})$  correspond to the true SNP-specific genetic variance, which are normalized such that they summed  
594 up to the true total heritability. Under the infinitesimal model,  $\mathbf{D}(\boldsymbol{\theta}) = \text{diag}(h^2/p, \dots, h^2/p)$ ; for sparse  
595 architectures, we simulated the joint effect sizes from a mixture of normal components, one of which is  
596 null (*i.e.*, point mass at zero); for frequency-dependent architectures, we assumed that the genetic variance  
597 of SNP  $j$  was proportional to a function of its allele frequency,  $\sigma_j^2 \propto (f_j(1 - f_j))^\alpha$ , where  $\alpha$  determines  
598 the strength of the dependency<sup>9,28</sup>. We considered two alternative links for SNP-specific heritability, the  
599 exponential function,  $g_\tau^{-1}(\mathbf{a}_j) = \exp(\mathbf{a}_j^\top \boldsymbol{\tau})$ , and the ReLU activation function,  $g_\tau^{-1}(\mathbf{a}_j) = \max\{0, \mathbf{a}_j^\top \boldsymbol{\tau}\}$   
600 (Note that the max function is not invertible, but we keep using the  $g^{-1}$  notation to be consistent with the  
601 GLM literature, where link refers to the mapping from the expected response to a linear combination of  
602 predictors).

603 We computed the LD scores using the LDGM precision matrices by taking the sum of the squared  
604 correlations between two SNPs. This ensures that the set of variants used for graphREML and S-LDSC is  
605 closely aligned. To further increase comparability between graphREML and S-LDSC in simulations, we  
606 included SNPs with large  $\chi^2$  in S-LDSC at the regression step (since graphREML accounts for all SNPs  
607 regardless of their effect sizes) even though by default, S-LDSC removes SNPs with  $\chi^2$  greater than 80.



608 We also fixed the intercept of graphREML at the intercept estimated by S-LDSC such that confounding  
609 related to population stratification is adjusted in the same way between two methods. The 14 functional real  
610 functional annotations we included in the simulation studies are coding, conserved, enhancer, DHS, DHS  
611 peaks, promoter and repressed, along with their flanking regions (<500kb). We chose these annotations  
612 because they are well-known and studied; they are also well-powered (*i.e.*, the annotations are not too  
613 small). In addition, we simulated 4 random annotations, which comprise 1% of the SNPs, 10% of the  
614 SNPs 1% of the LD blocks and 10% of the LD blocks. To account for frequency-dependent architecture in  
615 estimation, we either incorporated a single continuous-valued MAF annotation or a set of 10 binary MAF  
616 bins (same as the baselineLD model).

## 617 **Real trait analyses**

618 We analyzed a diverse set of GWAS summary statistics downloaded from different sources (see URLs).  
619 For method comparisons, we applied graphREML and S-LDSC to estimate the heritability enrichment of  
620 7 well-powered quantitative traits – height, BMI, red blood count (RBC), monocyte count (Mono), platelet  
621 count (Plt), years of education, and neuroticism, using the publicly available summary statistics<sup>36,37</sup>. We  
622 also applied the two methods to the summary statistics of 11 less-well-powered disease phenotypes –  
623 Alzheimer’s disease (AD), bowel cancer, breast cancer, cardiovascular diseases (CAD), chronic obstructive  
624 pulmonary diseases (COPD), depression (DEP), hypertension (HTN), lung cancer, Parkinson’s disease  
625 (PD), prostate cancer and type II diabetes (T2D). The summary statistics for these traits were derived  
626 using the liability threshold family history model (LTFH)<sup>4</sup>.

627 For validation analyses, we applied graphREML to European-ancestry summary statistics for which  
628 UKB was not the major source of GWAS sample (average  $n = 235,331$ ; **Supplementary Table 9**). We also  
629 analyzed a set of summary statistics that are based on GWAS of East Asians ( $n = 91,045$ ; **Supplementary**  
630 **Table 10**). These summary statistics were identified based on their availability and to maximize overlap  
631 with traits we used for method comparison (**Supplementary Table 7**).

## 632 **Score test for inference on joint enrichment**

633 We derived a score test to circumvent the need of refitting graphREML for every new annotation, as long  
634 as the set of baseline annotations to be conditioned on is the same. Below we outline the key steps of the  
635 score test procedure. Further details, such as its derivation, the intuitions and the computational aspects of  
636 the test are provided in the **Supplementary Notes**.

637 1. Run graphREML to fit the null model (*i.e.*, only including the baseline annotations), and store  
638 two variant-wise statistics. (These values roughly correspond to the gradient and Hessian of the  
639 likelihoods, with respect to the per-SNP heritability. The exact definitions of these values are  
640 provided in the **Supplementary Notes**.)

641 2. Perform the score test

(a) Construct the score statistic using the SNP-specific values stored in Step 1, along with the new  
annotation to be tested. The score statistics for the test of a single annotation can be written  
as,

$$S_{K+1} = \frac{U_{K+1}(\theta^*)^2}{\text{Var}(U_{K+1}(\theta^*))},$$

642 where  $U_{K+1}(\theta^*)$  is the score for the new annotation aggregated from all markers, and  
643  $\text{Var}(U_{K+1}(\theta^*))$  is the jackknife variance estimator (see details in **Supplementary Notes**).

644 (b) Compute the empirical variance of the score statistic using jackknife, leaving one LD block  
645 at a time. We account for the uncertainty in the parameter estimates of the null model  
646 (**Supplementary Notes**).

647 (c) Compute the p-value by comparing the normalized score statistic against the chi-squared  
648 distribution (with one degree of freedom if only one annotation is tested).

649 3. Compare the significance levels across the set of annotations tested and control for multiple testing.

650 This test is performed using an efficient block jackknife procedure, such that it accounts for the uncertainty  
651 in the parameter estimates from the null model (**Supplementary Notes**).

652 To evaluate the type I error rate and power of the score test, we simulated quantitative traits under  
653 different genetic architectures, using the real LDGM precision matrices derived from the UK Biobank,  
654 along with the same set of annotations as those used in the validation analyses (*i.e.*, coding, conserved,  
655 DHS, enhancer, promoter and repressed). The joint effect sizes are drawn from a mixture of normal  
656 components, one of which is null (*i.e.*, point mass at zero); we varied the proportion of null variants from  
657 0% to 99.9% and normalized the total heritability to be 0.1 in all simulation settings. We assumed the  
658 true non-null annotations are coding and conserved. For type I error rate, we ran score test on promoter  
659 and repressed, conditional on all the other annotations. Note that our null model excludes the annotations  
660 to be tested for type I error, but includes the non-null annotations due to potential overlaps between the  
661 non-null and the null annotations (*e.g.*, coding and promoter have large overlaps). For the power analyses,  
662 we varied the true enrichment of the non-null annotations, but largely kept them at realistic values. We  
663 referenced the published meta-analyses results from Finucane *et al.*<sup>3</sup> for the estimated enrichment of  
664 coding and conserved SNPs from real traits. Their estimates from the meta-analyses are 7.124(0.842) and  
665 13.318(1.503) for coding and conserved respectively. Alpha level is set to 0.05 for all of our tests.

666 To assess the concordance between the inference results from the Wald test and those from the Score  
667 test, we compared the enrichment estimates and their p-values for the same set of annotations and real  
668 traits as those used in the validation analyses. For clarity, we call the set of annotations we are interested  
669 in testing their enrichment the "new annotations", and the set of annotations we want to condition on the  
670 "baseline annotations". For the marginal enrichment, the p-values of the Wald test are based on fitting  
671 graphREML to the set of baseline annotations and new annotations jointly, after which we extract the  
672 p-values for the marginal enrichments of the new annotations; the p-values of the Score test are based  
673 on fitting graphREML to the all-one annotation first and then applying the score test to each of the new  
674 annotations separately in turn. For the joint enrichment, the p-values of the Wald test are based on fitting  
675 graphREML to the baseline annotations plus a new annotations, one at a time, and then extracting the  
676 p-values for the new annotations; the p-values of the Score test are based on fitting graphREML to the  
677 baseline annotations first and then applying the score test to each of the new annotations separately in turn.

## 678 Applying graphREML to Abstract Mediation Model (AMM)

679 The abstract mediation model (AMM) characterizes the distance-dependent relationship between trait-  
680 associated variants and the genes that mediate their effects. In particular, it quantifies the fraction of  
681 heritability mediated by the closest, second-closest, or  $k$ th-closest genes, and leverages the proximity of  
682 SNPs to genes that belong to an enriched gene set to partition gene-mediated heritability.

683 Let  $G_j^{(k)}$  denote the  $k$ th closest gene to SNP  $j$  and let  $\mathbf{a}_j^{(k)}$  be an indicator *i.e.*, binary annotation, of  
684 whether  $G_j^{(k)}$  is in the gene set of interest,  $A$ . We model the heritability of SNP  $j$  mediated by its  $k$ th  
685 nearest gene as the following,

$$\sigma_j^2(G_j^{(k)}) = f(\boldsymbol{\theta}^\top \mathbf{b}_j) p^{(k)} \left( 1 + \sum_k f(\gamma_k) \mathbf{a}_j^{(k)} \right) \quad (4)$$

686 where  $f(\cdot)$  is some smooth and non-negative function we choose for estimation, analogous to the inverse  
687 link above, *e.g.*, softmax. For clarity, we use separate notations –  $\boldsymbol{\theta}$  and  $\gamma$  as parameters,  $\mathbf{b}_j$  and  $\mathbf{a}_j$  as  
688 annotation values – for the baseline and the  $k$ th nearest gene annotations, respectively.

689 We define the excess per-SNP heritability mediated by the nearest genes (in gene set  $A$ ) as  $\tau(A) \equiv$   
690  $\sum_k f(\gamma_k)$ . In other words, the excess heritability explained by a SNP with its closest  $k$ th gene in  $A$ , scaled  
691 by its background heritability, is  $p^{(k)} \tau(A)$ . Summing up the mediated heritability across all nearest genes  
692 considered, we have the model for the expected per-SNP heritability  $j$ ,

$$\sigma_j^2 = f(\boldsymbol{\theta}^\top \mathbf{b}_j) \left( 1 + \sum_k f(\gamma_k) \mathbf{a}_j^{(k)} \right). \quad (5)$$

693 Similar to Weiner *et al.*, we bin the gene proximity annotations to increase power. Let  $q$  denote a gene bin  
694 and let  $n_q$  denote the number of genes aggregated together for bin  $q$ . We estimate the fraction of per-SNP  
695 heritability mediated by the nearest genes in gene set  $A$  as  $p^{(q)} = \frac{f(\gamma_q) n_q}{\sum_l f(\gamma_l) n_l} = \frac{f(\gamma_q) n_q}{\tau(A)}$ . For meta-analyses,  
696 we weigh each trait by its total heritability before obtaining the average  $p^{(k)}$  across traits. We define the  
697 average mediated heritability enrichment of a gene set as  $e(A) = \frac{1 + \tau(A)}{1 + \tau(A) \frac{N(A)}{N}}$ , where  $N(A)/N$  is the fraction  
698 of genes in set  $A$ .

699 Our model differs from the original AMM model in two main ways. First, we allow the baseline  
700 annotations of a SNP ( $\mathbf{b}_j$ ) to affect its "background heritability" or the per-SNP heritability if none of its  
701 nearby genes lies in the gene set. More specifically, S-LDSC models the heritability contributed from  
702 the baseline annotations and the excess heritability mediated by genes in the gene set additively,  $\theta^\top \mathbf{b}_j +$   
703  $\sum_k \gamma_k \mathbf{a}_j^{(k)}$ ; graphREML, on the other hand, assumes a multiplicative model and enables the "interaction"  
704 between the baseline annotations and the nearest gene annotations,  $f(\theta^\top \mathbf{b}_j) \left(1 + \sum_k f(\gamma_k) \mathbf{a}_j^{(k)}\right)$ . Second,  
705 we apply a non-negative link  $f(\cdot)$  to ensure the validity of our per-SNP heritability estimates. In other  
706 words, S-LDSC accounts for the AMM annotations as  $\sum_k \gamma_k \mathbf{a}_j^{(k)}$  whereas graphREML uses  $\sum_k f(\gamma_k) \mathbf{a}_j^{(k)}$ .  
707 Our definition of enrichment is similar to Equation 6 in Weiner *et al.* but differs slightly in that we assume  
708  $\tau(A)$  has been scaled by the background heritability at the SNP level, *i.e.*, divided out by  $f(\theta^\top \mathbf{b}_j)$  as in  
709 Equation (4).

710 In simulations, we generated GWAS Z-scores using the *simulateSumstats* function in the LDGM  
711 package (see Code Availability). The true per-SNP heritability was defined using the following generative  
712 link function,

$$\sigma_j^2 = f(\theta^\top \mathbf{b}_j) \left(1 + \sum_k \tau(A) p^{(k)} \mathbf{a}_j^{(k)}\right). \quad (6)$$

713 We started with the set of "baselineLD minus" annotations which exclude annotations that control for genic  
714 elements relevant to constrained genes, such as conservation, minor allele frequency, and ancient sequence  
715 annotation. Out of these 66 annotations, we randomly selected four baseline annotations to assign heritable  
716 signals (non-zero  $\theta$  elements; these values are set to [1, 2, 1.5, 2.5]). We assume the fraction of mediated  
717 heritability across the four nearest genes as  $p^{(k)} = [0.4, 0.3, 0.2, 0.1]$ . The total excess per-SNP heritability  
718 of the enriched gene set A is  $\tau(A) = 2$ . We applied graphREML to AMM and estimated the heritability  
719 mediated by the constrained genes. We varied the sample size to be  $10^4$ ,  $10^6$  and  $10^8$ , and generated the  
720 effect sizes under three levels of polygenicity, assuming 99.9%, 99%, 90% of the variants are null. Under  
721 each of these six settings, we repeated the simulations 30 time and ran graphREML using the full set of  
722 baseline annotations and the AMM link function in equation (4). Because we observed numerical stability  
723 issues due to the exponential terms, we modified our link function to address these overflow issues by

724 implementing a piece-wise version of the softmax (**Supplementary Notes**).

For real-trait analyses, we applied AMM to the GWAS summary statistics for the same set of traits as we analyzed before, including both well-powered quantitative traits and disease traits with less power. We used the LDGM precision matrices derived from the UK biobank. We used highly constrained genes (pLI > 0.9) which are intolerant of heterozygous loss-of-function variation (see Weiner *et al.*) as our enriched gene set. To increase the power of our  $p^{(k)}$  estimates, we binned annotations in the 3rd through 5th, 6th through 10th, 11th through 20th, and 21st through 50th nearest genes. We performed meta-analyses across traits by taking the ratio of the weighted averages,

$$p_{meta}^{(k)} = \frac{\sum_t f(\gamma_{k,t}) \cdot h_t^2}{\sum_t \sum_l f(\gamma_{l,t}) \cdot h_t^2},$$

725 where the weights are the trait-specific total heritability. To obtain standard errors on the estimates, we use  
726 the jackknife values of  $\gamma_{k,t}$  to compute the jackknife estimates of  $p_{meta}^{(k)}$ . The standard error is computed as  
727 the standard deviation of these jackknife estimates, multiplied by square root of the number of LD blocks.

## 728 **Data availability**

729 The baselineLD annotations can be downloaded on Google Cloud ([https://storage.googleapis.com/broad-](https://storage.googleapis.com/broad-alkesgroup-public-requester-pays/LDSCORE/baselineLF_v2.2.UKB.tar.gz)  
730 [alkesgroup-public-requester-pays/LDSCORE/baselineLF\\_v2.2.UKB.tar.gz](https://storage.googleapis.com/broad-alkesgroup-public-requester-pays/LDSCORE/baselineLF_v2.2.UKB.tar.gz)). The constrained gene sets  
731 can be downloaded from the AMM Github repository  
732 ([https://github.com/danjweiner/AMM21/blob/main/AMM\\_genesets/AMM\\_gs\\_constrained.txt](https://github.com/danjweiner/AMM21/blob/main/AMM_genesets/AMM_gs_constrained.txt)). LDGM  
733 precision matrices derived from the 1000 Genome are available from Zenodo  
734 (<https://doi.org/10.5281/zenodo.8157131>).

## 735 **Code availability**

736 Our method (graphREML) has been implemented as an open-source package, written primarily in  
737 Matlab, available on Github at <https://github.com/huilisabrina/graphREML>. We also used the open-source  
738 LDGM package and S-LDSC package, available on Github at <https://github.com/awohns/ldgm> and

739 <https://github.com/bulik/ldsc>.

## 740 References

- 741 1. Zhou, H. *et al.* Favor: functional annotation of variants online resource and annotator for variation  
742 across the human genome. *Nucleic Acids Res.* **51**, D1300–D1311 (2023).
- 743 2. Gusev, A. *et al.* Partitioning heritability of regulatory and cell-type-specific variants across 11 common  
744 diseases. *The Am. J. Hum. Genet.* **95**, 535–552 (2014).
- 745 3. Finucane, H. K. *et al.* Partitioning heritability by functional annotation using genome-wide association  
746 summary statistics. *Nat. genetics* **47**, 1228–1235 (2015).
- 747 4. Hujoel, M. L., Gazal, S., Hormozdiari, F., van de Geijn, B. & Price, A. L. Disease heritability enrich-  
748 ment of regulatory elements is concentrated in elements with ancient sequence age and conserved  
749 function across species. *The Am. J. Hum. Genet.* **104**, 611–624 (2019).
- 750 5. Finucane, H. K. *et al.* Heritability enrichment of specifically expressed genes identifies disease-  
751 relevant tissues and cell types. *Nat. genetics* **50**, 621–629 (2018).
- 752 6. Hormozdiari, F. *et al.* Leveraging molecular quantitative trait loci to understand the genetic architecture  
753 of diseases and complex traits. *Nat. genetics* **50**, 1041–1047 (2018).
- 754 7. Gazal, S. *et al.* Linkage disequilibrium–dependent architecture of human complex traits shows action  
755 of negative selection. *Nat. genetics* **49**, 1421–1427 (2017).
- 756 8. Gazal, S. *et al.* Functional architecture of low-frequency variants highlights strength of negative  
757 selection across coding and non-coding annotations. *Nat. genetics* **50**, 1600–1607 (2018).
- 758 9. Schoech, A. P. *et al.* Quantification of frequency-dependent genetic architectures in 25 uk biobank  
759 traits reveals action of negative selection. *Nat. communications* **10**, 790 (2019).
- 760 10. Zeng, J. *et al.* Signatures of negative selection in the genetic architecture of human complex traits.  
761 *Nat. genetics* **50**, 746–753 (2018).
- 762 11. Wainschein, P. *et al.* Assessing the contribution of rare variants to complex trait heritability from  
763 whole-genome sequence data. *Nat. Genet.* **54**, 263–273 (2022).



- 764 **12.** Weiner, D. J. *et al.* Polygenic architecture of rare coding variation across 394,783 exomes. *Nature*  
765 **614**, 492–499 (2023).
- 766 **13.** Bulik-Sullivan, B. K. *et al.* Ld score regression distinguishes confounding from polygenicity in  
767 genome-wide association studies. *Nat. genetics* **47**, 291–295 (2015).
- 768 **14.** Yang, J. *et al.* Common snps explain a large proportion of the heritability for human height. *Nat.*  
769 *genetics* **42**, 565–569 (2010).
- 770 **15.** Speed, D., Hemani, G., Johnson, M. R. & Balding, D. J. Improved heritability estimation from  
771 genome-wide snps. *The Am. J. Hum. Genet.* **91**, 1011–1021 (2012).
- 772 **16.** Loh, P.-R. *et al.* Contrasting genetic architectures of schizophrenia and other complex diseases using  
773 fast variance-components analysis. *Nat. genetics* **47**, 1385 (2015).
- 774 **17.** Ning, Z., Pawitan, Y. & Shen, X. High-definition likelihood inference of genetic correlations across  
775 human complex traits. *Nat. genetics* **52**, 859–864 (2020).
- 776 **18.** Benner, C. *et al.* Prospects of fine-mapping trait-associated genomic regions by using summary  
777 statistics from genome-wide association studies. *The Am. J. Hum. Genet.* **101**, 539–551 (2017).
- 778 **19.** Wen, X. & Stephens, M. Using linear predictors to impute allele frequencies from summary or pooled  
779 genotype data. *The annals applied statistics* **4**, 1158 (2010).
- 780 **20.** Weissbrod, O. *et al.* Functionally informed fine-mapping and polygenic localization of complex trait  
781 heritability. *Nat. Genet.* **52**, 1355–1363 (2020).
- 782 **21.** Vilhjálmsson, B. J. *et al.* Modeling linkage disequilibrium increases accuracy of polygenic risk scores.  
783 *The american journal human genetics* **97**, 576–592 (2015).
- 784 **22.** Shi, H., Kichaev, G. & Pasaniuc, B. Contrasting the genetic architecture of 30 complex traits from  
785 summary association data. *The Am. J. Hum. Genet.* **99**, 139–153 (2016).
- 786 **23.** Shi, H., Mancuso, N., Spendlove, S. & Pasaniuc, B. Local genetic correlation gives insights into the  
787 shared genetic architecture of complex traits. *The Am. J. Hum. Genet.* **101**, 737–751 (2017).

- 788 **24.** Song, S., Jiang, W., Zhang, Y., Hou, L. & Zhao, H. Leveraging ld eigenvalue regression to improve  
789 the estimation of snp heritability and confounding inflation. *The Am. J. Hum. Genet.* (2022).
- 790 **25.** Li, H., Mazumder, R. & Lin, X. Accurate and efficient estimation of local heritability using summary  
791 statistics and the linkage disequilibrium matrix. *Nat. Commun.* **14**, 7954 (2023).
- 792 **26.** Salehi Nowbandegani, P. *et al.* Extremely sparse models of linkage disequilibrium in ancestrally  
793 diverse association studies. *Nat. Genet.* **55**, 1494–1502 (2023).
- 794 **27.** Kelleher, J. *et al.* Inferring whole-genome histories in large population datasets. *Nat. genetics* **51**,  
795 1330–1338 (2019).
- 796 **28.** Speed, D. & Balding, D. J. Sumher better estimates the snp heritability of complex traits from  
797 summary statistics. *Nat. genetics* **51**, 277–284 (2019).
- 798 **29.** Weiner, D. J., Gazal, S., Robinson, E. B. & O’Connor, L. J. Partitioning gene-mediated disease  
799 heritability without eqtls. *The Am. J. Hum. Genet.* **109**, 405–416 (2022).
- 800 **30.** Zhu, X. & Stephens, M. Bayesian large-scale multiple regression with summary statistics from  
801 genome-wide association studies. *The annals applied statistics* **11**, 1561 (2017).
- 802 **31.** McCullagh, P. & Nelder, J. *Generalized linear models* (Routledge, 1989).
- 803 **32.** Gazal, S., Marquez-Luna, C., Finucane, H. K. & Price, A. L. Reconciling s-ldsc and ldak functional  
804 enrichment estimates. *Nat. genetics* **51**, 1202–1204 (2019).
- 805 **33.** Tashman, K. C., Cui, R., O’Connor, L. J., Neale, B. M. & Finucane, H. K. Significance testing for  
806 small annotations in stratified ld-score regression. *medRxiv* 2021–03 (2021).
- 807 **34.** Consortium, I. H. . *et al.* Integrating common and rare genetic variation in diverse human populations.  
808 *Nature* **467**, 52 (2010).
- 809 **35.** Yang, J. *et al.* Genetic variance estimation with imputed variants finds negligible missing heritability  
810 for human height and body mass index. *Nat. genetics* **47**, 1114–1120 (2015).

- 811 **36.** Loh, P.-R. *et al.* Efficient bayesian mixed-model analysis increases association power in large cohorts.  
812 *Nat. genetics* **47**, 284–290 (2015).
- 813 **37.** UKB GWAS of everything release 2 (August 1, 2018). <http://www.nealelab.is/uk-biobank>. Accessed:  
814 2023-01-01.
- 815 **38.** Luo, Y. *et al.* Estimating heritability and its enrichment in tissue-specific gene sets in admixed  
816 populations. *Hum. molecular genetics* **30**, 1521–1534 (2021).
- 817 **39.** Brown, B. C., Ye, C. J., Price, A. L. & Zaitlen, N. Transethnic genetic-correlation estimates from  
818 summary statistics. *The Am. J. Hum. Genet.* **99**, 76–88 (2016).
- 819 **40.** Shi, H. *et al.* Population-specific causal disease effect sizes in functionally important regions impacted  
820 by selection. *Nat. communications* **12**, 1098 (2021).
- 821 **41.** Trubetskoy, V. *et al.* Mapping genomic loci implicates genes and synaptic biology in schizophrenia.  
822 *Nature* **604**, 502–508 (2022).
- 823 **42.** Sakaue, S. *et al.* A cross-population atlas of genetic associations for 220 human phenotypes. *Nat.*  
824 *genetics* **53**, 1415–1424 (2021).
- 825 **43.** Howard, D. M. *et al.* Genome-wide meta-analysis of depression identifies 102 independent variants  
826 and highlights the importance of the prefrontal brain regions. *Nat. neuroscience* **22**, 343–352 (2019).
- 827 **44.** Hou, K. *et al.* Accurate estimation of snp-heritability from biobank-scale data irrespective of genetic  
828 architecture. *Nat. genetics* **51**, 1244–1251 (2019).
- 829 **45.** Ma, R. & Dicker, L. H. The mahalanobis kernel for heritability estimation in genome-wide association  
830 studies: fixed-effects and random-effects methods. *arXiv preprint arXiv:1901.02936* (2019).
- 831 **46.** Zhu, X., Duren, Z. & Wong, W. H. Modeling regulatory network topology improves genome-wide  
832 analyses of complex human traits. *Nat. communications* **12**, 2851 (2021).
- 833 **47.** Border, R. *et al.* Assortative mating biases marker-based heritability estimators. *Nat. communications*  
834 **13**, 660 (2022).

- 835 **48.** Border, R. *et al.* Cross-trait assortative mating is widespread and inflates genetic correlation estimates.  
836 *Science* **378**, 754–761 (2022).
- 837 **49.** Conneely, K. N. & Boehnke, M. So many correlated tests, so little time! rapid adjustment of p values  
838 for multiple correlated tests. *The Am. J. Hum. Genet.* **81**, 1158–1168 (2007).
- 839 **50.** Campbell, Y. E. & Davis, T. A. Computing the sparse inverse subset: an inverse multifrontal approach.  
840 *Univ. Florida, Tech. Rep. TR-95-021* (1995).
- 841 **51.** Chen, Y., Davis, T. A., Hager, W. W. & Rajamanickam, S. Algorithm 887: Cholmod, supernodal  
842 sparse cholesky factorization and update/downdate. *ACM Transactions on Math. Softw. (TOMS)* **35**,  
843 1–14 (2008).
- 844 **52.** Davis, T. A. & Hager, W. W. Dynamic supernodes in sparse cholesky update/downdate and triangular  
845 solves. *ACM Transactions on Math. Softw. (TOMS)* **35**, 1–23 (2009).

## 846 **Acknowledgements**

847 We are very grateful to Alkes Price and Samuel Kou for their helpful discussions and feedback. We thank  
848 Dan Weiner for his assistance to Tushar Kamath with the application of graphREML to AMM. We thank  
849 the participants of the individual in the UK Biobank. This work was supported by grants R35-CA197449,  
850 U19-CA203654, R01-HL163560, U01-HG012064, and U01-HG009088 (to X. L.) and by grant R35  
851 GM155278 (to L.O.).

## 852 **Author contributions statement**

853 H.L., T.M., L.O. and X.L. conceived and designed the experiments. H.L. performed the experiments and  
854 the statistical analyses. H.L. and L.O. wrote the manuscript with the participation of R.M. and X.L. L.O  
855 and X.L. supervised the project.
